# Supplementary material for: Association between Gait Variability and Gait-Ability Decline in Elderly Women with Subthreshold Insomnia Stage
Source: Int J Environ Res Public Health. 2020 Jul 17;17(14):5181. doi: 10.3390/ijerph17145181 (PMC7400183; doi:10.3390/ijerph17145181)
Supplement: Supplementary file 1 [file ijerph-17-05181-s001.xlsx]

## Sheet: Raw data
	Participant Information								Clinical information							Gait-related variables: Slower speed condition																		Gait-related variables: Preferred speed condition
No	Participants	Group	Gender	Age_yr	Height_cm	Weight_Kg	BMI_kg/m2	Body_Fat_%	ISI__score	SRI-MF_score	MMSE__score	Vigorous_PA_Mets	Moderate_PA_Mets	Walking_PA_Mets	Total_PA_Mets	Slower_Walking speed_m/s	Slower_Stride_Length_m	Slower_Step_Length_m	Slower_Cadence_beats/min	Slower_Stride_time_s	Slower_Step_time_s	Slower_Single_Support_%	Slower_Double_Support_%	Slower_Stance_phase_%	Slower_CV_stride_length_%	Slower_CV_step_length_%	Slower_CV_single_support_%	Slower_CV_double_support_%	Slower_CV_stance_phase_%	Slower_CV_stride_time_%	Slower_CV_step_time_%	Slower_Gait_asymmetry_%	Slower_Phase_coordinate_index_%	Preferred_Walking speed_m/s	Preferred_Stride_Length_m	Preferred_Step_Length_m	Preferred_Cadence_beats/min	Preferred_Stride_time_s	Preferred_Step_time_s	Preferred_Single_Support_%	Preferred_Double_Support_%	Preferred_Stance_phase_%	Preferred_CV_stride_length_%	Preferred_CV_step_length_%	Preferred_CV_single_support_%	Preferred_CV_double_support_%	Preferred_CV_stance_phase_%	Preferred_CV_stride_time_%	Preferred_CV_step_time_%
1	Insomnia_001	Insomnia	Female	66	162	67.5	25.7	37.3	10	23	25	0	720	231	951	0.83	1.07	0.54	92	1.29	0.64	37.16	24.77	61.92	2.49	1.54	5.99	4.82	4.19	2.49	2.4	2.48	4.52	1.06	1.15	0.58	109	1.09	0.55	38.53	22.22	60.75	1.21	0.71	2.31	3.77	1.59	1.21	1.3
2	Insomnia_002	Insomnia	Female	65	157	58.8	23.9	28.8	13	2	28	3600	600	8316	12516	0.72	0.84	0.42	101	1.17	0.58	34.32	31.35	65.66	5.59	3.28	6.46	15.09	7.05	5.59	5.62	0.05	4.18	0.92	0.96	0.48	114	1.05	0.52	36.62	26.73	63.36	3.45	1.82	5.18	10.46	4.28	3.45	3.48
3	Insomnia_003	Insomnia	Female	68	158	65.4	26.2	40.5	13	22	28	1800	900	742.5	3442.5	0.67	0.75	0.38	105	1.13	0.56	38.43	21.79	60.22	4.46	2.61	7.39	12.89	7.05	4.46	4.62	3.47	4.35	0.83	0.86	0.43	115	1.03	0.52	39.14	20.5	59.64	2.15	1.04	4.28	10.19	3.1	2.15	2.01
4	Insomnia_004	Insomnia	Female	66	160	63	24.6	34.8	8	2	28	3600	1800	1485	6885	0.78	0.93	0.46	100	1.19	0.6	34.68	26.73	61.42	3.07	1.91	5.24	10.45	4.83	3.07	3.2	10.65	5.74	0.97	1.04	0.52	112	1.07	0.53	36.31	23.47	59.77	2.25	1.2	4.02	4.84	3.19	2.25	2.24
5	Insomnia_005	Insomnia	Female	67	148	51.3	23.4	33.2	8	19	28	0	480	594	1074	0.94	1.12	0.56	100	1.19	0.59	37.11	25.32	62.43	1.45	0.97	3.12	6.93	2.01	1.45	1.64	1.33	2.59	1.19	1.22	0.61	117	1.02	0.51	38.51	22.57	61.08	1.18	0.53	2.17	5.38	1.42	1.18	1.04
6	Insomnia_006	Insomnia	Female	67	155	59.2	24.6	33.5	12	21	29	0	3600	2079	5679	0.89	1	0.5	106	1.13	0.56	36.77	26.04	62.81	2.9	1.52	4.04	8.29	3.44	2.9	2.7	1.13	2.36	1.11	1.14	0.57	116	1.03	0.51	38.1	23.16	61.26	1.15	0.53	1.93	5.41	1.46	1.15	1.02
7	Insomnia_007	Insomnia	Female	66	158	64.4	25.8	32.3	13	27	24	0	1200	495	1695	0.78	0.95	0.48	97	1.22	0.61	37.78	23.84	61.62	3.63	2.25	6.07	12.44	4.14	3.63	3.68	1.6	5.36	0.97	1.06	0.53	110	1.09	0.54	39.29	21.31	60.6	1.68	0.88	3.95	10.53	2.46	1.68	1.62
8	Insomnia_008	Insomnia	Female	66	160	67.3	26.3	35.4	8	16	30	0	1440	495	1935	0.69	1.04	0.52	80	1.5	0.75	36.05	27.41	63.47	3.73	2.84	7.95	13.22	5.72	3.73	3.8	1.32	4.63	0.86	1.15	0.57	90	1.33	0.67	36.98	26.43	63.41	2.1	1.18	4.63	9.36	2.73	2.1	1.77
9	Insomnia_009	Insomnia	Female	69	150	62	27.6	33	9	4	28	0	720	396	1116	0.78	0.83	0.41	112	1.06	0.53	36.8	26.41	63.2	2.63	1.5	4.96	6.43	4.06	2.63	2.81	0	3.51	0.97	0.93	0.46	125	0.95	0.48	38.22	23	61.22	1.75	0.8	2.92	7.09	2.13	1.75	1.68
10	Insomnia_010	Insomnia	Female	67	154	67	28.3	35.8	14	6	25	0	2400	1980	4380	0.56	0.74	0.37	89	1.34	0.67	31.22	36.74	67.96	4.57	3.28	12.12	17.96	8.07	4.57	4.9	2.58	6.84	0.69	0.77	0.39	107	1.11	0.56	33.94	31.09	65.03	3.07	1.73	6.54	5.89	4.42	3.07	3.12
11	Insomnia_011	Insomnia	Female	65	163	62	23.3	32.9	14	3	27	0	1200	990	2190	0.89	1.13	0.57	94	1.27	0.64	37.74	23.64	61.39	1.5	1.07	3.28	4.65	2.39	1.5	1.68	2.29	3.43	1.11	1.25	0.63	106	1.13	0.56	38.6	22.37	60.97	2.45	1.33	2.37	6.55	2.22	2.45	2.35
12	Insomnia_012	Insomnia	Female	67	160	60	23.4	29	14	14	27	1440	2400	1980	5820	0.89	1.04	0.52	102	1.17	0.58	38.35	24.36	62.7	3.33	1.99	5.56	9.46	4.11	3.33	3.41	2.77	4.47	1.11	1.15	0.58	115	1.04	0.52	39.47	22.8	62.27	1.27	0.67	2.19	4.57	1.63	1.27	1.3
13	Insomnia_013	Insomnia	Female	65	150	49	21.8	28.7	14	3	27	0	2400	1980	4380	0.78	0.91	0.45	102	1.17	0.58	35.93	26.97	62.91	1.7	1.08	3.47	4.7	2.62	1.7	1.85	3.18	3.13	0.97	0.99	0.49	118	1.01	0.51	37.76	23.76	61.53	1.35	0.7	1.77	4.88	1.63	1.35	1.39
14	Insomnia_014	Insomnia	Female	69	156	68	27.9	34.5	8	6	30	0	1200	1188	2388	0.72	0.79	0.39	109	1.09	0.55	37.04	24.84	61.89	7.98	4.31	9.66	17.49	10.31	7.98	7.9	2.85	6.25	0.89	1.05	0.52	102	1.18	0.59	37.21	24.55	61.76	2.72	1.63	3.92	8.26	3.77	2.72	2.76
15	Insomnia_015	Insomnia	Female	67	160	59	23	26	8	7	29	1440	600	924	2964	0.56	0.61	0.3	109	1.1	0.55	31.51	37.56	69.07	4.37	2.56	5.1	9.22	6.17	4.37	4.67	1.87	5.4	0.69	0.7	0.35	119	1	0.5	34.07	32.71	66.78	3.27	1.34	4.37	8.43	4.9	3.27	2.67
16	Insomnia_016	Insomnia	Female	67	159	61	24.1	32	9	10	29	1200	600	924	2724	0.78	0.76	0.38	122	0.98	0.49	36.15	26.22	62.37	4.23	1.64	5.02	12.86	5.23	4.23	3.36	4.01	7.07	0.97	0.94	0.47	124	0.96	0.48	36.17	26.18	62.35	2.13	1.12	3.53	6.52	2.71	2.13	2.34
17	Insomnia_017	Insomnia	Female	69	153	64	27.3	36	9	6	28	960	1000	1386	3346	0.67	0.63	0.32	126	0.95	0.47	35.97	25.76	61.73	1.33	0.64	2.38	4.41	1.82	1.33	1.36	6.2	4.12	0.83	0.82	0.41	122	0.98	0.49	36.19	24.72	60.9	1.64	0.74	2.34	5.19	1.77	1.64	1.52
18	Insomnia_018	Insomnia	Female	67	160	63	24.6	29	9	7	30	2400	640	594	3634	0.78	0.98	0.49	95	1.26	0.63	37.61	24.79	62.39	2.53	1.51	4.09	5.04	3.51	2.53	2.41	0	3.2	0.97	1.07	0.53	108	1.1	0.55	38.07	22.92	60.99	1.33	0.77	2.1	5.7	1.71	1.33	1.39
19	Insomnia_019	Insomnia	Female	66	153	73	31.2	30	8	7	28	2400	480	396	3276	0.72	0.82	0.41	105	1.13	0.57	35.79	31.38	67.17	3.56	1.54	6.38	4.81	4.65	3.56	2.7	8.62	7.46	0.97	0.96	0.48	122	0.98	0.49	36.28	29.02	65.29	2.73	1.07	3.99	5.79	3.83	2.73	2.18
20	Insomnia_020	Insomnia	Female	66	155	55	22.9	28.9	14	3	27	2880	1200	2970	7050	0.67	0.91	0.46	87	1.37	0.69	34.15	29.91	64.06	3.21	2.04	7.24	13.8	5.55	3.21	2.97	5.11	5.18	0.83	0.98	0.49	101	1.18	0.59	35.81	26.82	62.63	3.11	1.82	3.99	7.04	3.92	3.11	3.09
21	Insomnia_021	Insomnia	Female	68	150	50	22.2	30	10	10	30	1600	600	792	2992	0.67	0.98	0.49	81	1.47	0.73	35.97	30.93	66.9	4.88	3.88	12.46	11.93	6.79	4.88	5.29	8.31	6.51	0.83	0.99	0.5	100	1.19	0.6	36.97	26.01	62.98	3.24	2.03	6.03	9.34	4.13	3.24	3.4
22	Insomnia_022	Insomnia	Female	67	155	61	25.4	25	10	8	28	1200	360	990	2550	0.72	0.78	0.39	110	1.08	0.54	34.84	25.36	60.21	6.82	1.91	4.82	18.25	9.34	6.82	3.55	13.29	13.94	0.83	0.78	0.39	127	0.94	0.47	35.74	20.4	56.14	8.57	1.42	3.83	26.47	10.2	8.57	3.01
23	Insomnia_023	Insomnia	Female	69	157	57	23.1	30	13	9	27	1680	1440	2772	5892	0.72	0.99	0.5	87	1.37	0.69	36.86	26.97	63.82	2.47	1.96	6.38	12.25	4.11	2.47	2.85	1.85	4.02	0.92	0.98	0.49	112	1.07	0.54	36.79	27.59	64.38	2.99	1.91	5.26	6.72	3.01	2.99	3.57
24	Insomnia_024	Insomnia	Female	69	155	58	24.1	33	8	2	28	4800	720	693	6213	0.56	0.79	0.4	83	1.43	0.71	35.32	27.99	63.31	4.11	2.88	6.98	9.93	6.66	4.11	4.03	3.8	5.17	0.69	0.83	0.42	99	1.2	0.6	37.57	27.08	64.65	3.58	2.14	5.63	9.14	4.65	3.58	3.56
25	Insomnia_025	Insomnia	Female	68	150	60	26.7	34.4	10	4	28	1440	1440	396	3276	0.72	0.94	0.47	92	1.3	0.65	36.44	26.38	62.82	9.55	6.08	13.49	15.21	11.87	9.55	9.42	1.96	4.42	0.89	1.07	0.53	99	1.2	0.6	36.77	25.32	62.09	3.06	1.81	3.93	6.24	2.71	3.06	3.01
26	Insomnia_026	Insomnia	Female	67	150	53	23.6	30.4	14	8	26	5760	2880	2376	11016	0.78	1.15	0.57	81	1.48	0.74	35.18	30.2	65.38	1.68	1.28	6.17	10	4.3	1.68	1.74	1.59	3.71	0.97	1.28	0.64	91	1.31	0.66	37.14	26.08	63.22	1.71	1.18	4.59	4.41	3.45	1.71	1.79
27	Insomnia_027	Insomnia	Female	67	157	62	25.2	33.2	14	12	27	2880	1440	0	4320	0.53	0.79	0.39	80	1.49	0.74	35.64	28.13	63.77	4.55	3.68	11.37	24.16	11.27	4.55	4.94	1.63	8.13	0.67	0.79	0.4	100	1.19	0.6	35.25	29.16	64.41	3.92	1.64	6.21	10.89	6.69	3.92	2.75
28	Insomnia_028	Insomnia	Female	69	153	57	24.3	32.8	9	0	27	2400	960	693	4053	0.78	1.14	0.57	82	1.46	0.73	34.84	31.33	66.17	1.52	1.3	5.57	9.14	2.75	1.52	1.79	3.19	3.91	0.97	1.24	0.62	93	1.28	0.64	37.21	26.86	64.08	1.56	0.96	3.78	5.23	2.86	1.56	1.5
29	Insomnia_029	Insomnia	Female	66	156	65	26.7	34.9	10	3	24	1200	1200	594	2994	0.67	1.12	0.56	71	1.68	0.84	32.55	35.91	68.45	2.17	1.75	9.14	16.31	6.23	2.17	2.09	3.11	4.27	0.83	1.17	0.58	86	1.4	0.7	35.57	29.92	65.49	1.42	1.07	4.37	6.4	2.83	1.42	1.54
30	Insomnia_030	Insomnia	Female	69	153	56	23.9	32.6	9	4	30	1200	0	594	1794	0.67	1.09	0.54	73	1.63	0.82	32.53	36.47	69	1.64	1.48	6.9	9.37	3.97	1.64	1.81	4.85	5.17	0.83	1.19	0.6	83	1.43	0.72	36.3	28.39	64.69	1.48	1.18	4.35	7.7	2.29	1.48	1.65
31	Insomnia_031	Insomnia	Female	65	159	61	24.1	31.2	10	0	28	1440	720	396	2556	0.78	1.15	0.58	81	1.48	0.74	34.95	30.89	65.83	1.4	0.99	5.13	7.26	2.83	1.4	1.33	2.1	2.94	0.97	1.26	0.63	92	1.3	0.65	37.73	25.46	63.18	1.01	0.62	2.33	4.98	1.37	1.01	0.95
32	Insomnia_032	Insomnia	Female	68	158	52	20.8	26	10	7	26	2880	720	1188	4788	0.67	1.09	0.55	73	1.64	0.82	31.7	37.19	68.89	1.78	1.53	8.66	9.31	4.57	1.78	1.86	1.89	4.18	0.83	1.21	0.6	83	1.45	0.73	36.04	28.29	64.33	1.16	0.86	3.86	5.52	2.33	1.16	1.18
33	Insomnia_033	Insomnia	Female	67	157	59	23.9	32.2	8	11	30	960	1440	1386	3786	0.67	1.14	0.57	70	1.7	0.85	34.43	34.48	68.91	1.87	1.59	9.15	15.2	4.96	1.87	1.87	10.08	5.18	0.83	1.23	0.62	80	1.47	0.74	36.86	27.2	64.07	2.84	1.71	7.24	9.97	4.2	2.84	2.32
34	Insomnia_034	Insomnia	Female	66	150	52	23.1	33.6	9	8	30	4320	600	1386	6306	0.67	1.12	0.56	71	1.68	0.84	32.14	36.67	68.81	2.32	2.05	7.66	10.01	5.59	2.32	2.45	2.99	3.94	0.83	1.2	0.6	83	1.44	0.72	35.39	29.4	64.79	1.44	1.04	4.15	6.51	2.7	1.44	1.45
35	Insomnia_035	Insomnia	Female	69	155	60	25	33	12	8	26	2880	480	594	3954	0.67	1.12	0.56	71	1.69	0.84	33.61	34.41	68.01	1.77	1.54	7.86	9.74	3.42	1.77	1.83	4.94	3.38	0.83	1.19	0.6	79	1.43	0.72	35.73	28	63.73	1.8	1.53	5.22	7.65	2.72	1.8	2.14
36	Insomnia_036	Insomnia	Female	66	156	61	25.1	32.6	14	9	27	2880	720	594	4194	0.89	1.25	0.63	85	1.41	0.71	35.93	28.39	64.32	1.56	1.01	4.69	6.05	2.49	1.56	1.42	0.68	6.95	1.11	1.35	0.68	98	1.22	0.61	37.15	25.13	62.28	0.93	0.53	2.44	4.66	1.45	0.93	0.87
37	Insomnia_037	Insomnia	Female	66	148	46	21	33.1	11	14	29	0	0	693	693	0.67	1	0.5	79	1.5	0.75	35.12	30.52	65.65	1.56	1.44	6.24	5.84	3.21	1.56	1.92	2.22	4.36	0.83	1.2	0.6	83	1.44	0.72	36.05	29.65	65.7	4.88	3.58	6.88	13.52	8.18	4.88	4.96
38	Insomnia_038	Insomnia	Female	65	158	54	21.6	29.5	13	10	30	0	1200	693	1893	0.89	1.23	0.62	86	1.39	0.69	35.08	30.07	65.15	1.93	1.25	7.93	10.6	3.33	1.93	1.8	0.65	3.75	1.11	1.38	0.69	95	1.25	0.62	36.44	27.06	63.5	1.59	1.04	3.06	6.57	2.43	1.59	1.67
39	Insomnia_039	Insomnia	Female	66	150	50	22.2	31.4	14	20	27	0	960	924	1884	0.75	1.09	0.55	82	1.46	0.73	34.08	31.69	65.78	2.38	2.21	5.92	12.21	5.01	2.38	3.03	0.41	4.67	0.94	1.26	0.63	90	1.34	0.67	35.74	28.65	64.4	2.28	1.47	5.44	6.1	3.06	2.28	2.2
40	Insomnia_040	Insomnia	Female	68	163	68	25.6	36.6	14	1	24	1440	480	594	2514	0.89	1.23	0.62	86	1.38	0.69	35.47	29.14	64.61	1.45	1.13	4.31	5.6	2.44	1.45	1.63	0.15	2.53	1.11	1.36	0.68	97	1.23	0.61	38.36	23.98	62.34	1.54	0.89	3.24	6.19	2.19	1.54	1.45
41	Insomnia_041	Insomnia	Female	67	157	57	23.1	32.1	13	10	30	960	720	990	2670	0.94	1.26	0.63	90	1.33	0.67	35.88	28.51	64.39	1.18	0.77	3.52	4.72	1.75	1.18	1.15	0.73	3.06	1.17	1.38	0.69	100	1.18	0.59	38.24	24.21	62.45	1.86	1.12	3.38	4.4	2.7	1.86	1.9
42	Insomnia_042	Insomnia	Female	69	163	60	22.6	31.2	8	9	30	0	480	693	1173	0.97	1.27	0.63	91	1.3	0.65	36.21	27.91	64.12	1.33	0.9	4.32	7.79	2.43	1.33	1.38	0.92	2.55	1.22	1.38	0.69	106	1.13	0.56	37.84	24.16	62	1.27	0.68	2.28	5.07	1.76	1.27	1.21
43	Insomnia_043	Insomnia	Female	65	150	45	20	28.5	12	13	30	0	1080	693	1773	0.89	1.24	0.62	85	1.39	0.7	36.58	28.09	64.67	2.05	1.2	4.86	6.18	2.92	2.05	1.73	3.46	3.98	1.11	1.36	0.68	97	1.22	0.61	38.3	24.23	62.52	1.93	1.22	4.63	5.99	2.66	1.93	2
44	Insomnia_044	Insomnia	Female	65	162	76.7	29.2	37.8	8	5	30	1440	240	693	2373	0.78	1.19	0.59	78	1.53	0.76	35.03	31.48	66.51	2.18	1.81	7.43	13.47	5.38	2.18	2.37	4.48	5.47	0.97	1.3	0.65	89	1.33	0.67	37.46	26.35	63.81	3.61	1.52	3.21	15.87	6.77	3.61	2.28
45	Insomnia_045	Insomnia	Female	68	158	80.4	32.2	40.2	8	0	27	4800	720	396	5916	0.67	0.95	0.48	84	1.43	0.71	36.51	26.67	63.19	2.81	1.46	6.13	16.16	5.62	2.81	2.05	0.81	7.08	0.83	1.04	0.52	95	1.25	0.63	38.5	22.8	61.31	2.89	2.39	9.17	16.07	5.03	2.89	3.83
46	Insomnia_046	Insomnia	Female	67	154	55.8	23.5	31.1	14	5	30	3840	720	594	5154	0.83	1.22	0.61	82	1.47	0.73	36.93	28.04	64.96	1.79	1.23	6.19	8.05	3.43	1.8	1.68	5.25	5.22	1.06	1.34	0.67	94	1.27	0.63	38.48	24.45	62.93	1.31	0.84	3.67	8.2	2.4	1.31	1.33
47	Insomnia_047	Insomnia	Female	65	150	53.2	23.6	30.1	8	1	25	0	1920	4158	6078	1.11	1.08	0.54	123	0.97	0.48	38.14	23.66	61.8	1.37	0.68	2.32	6.3	1.57	1.37	1.39	0.18	2.64	1.39	1.2	0.6	138	0.87	0.43	39.15	21.63	60.78	1.16	0.53	1.82	4.71	1.26	1.16	1.22
48	Insomnia_048	Insomnia	Female	66	162	54.5	20.8	27.5	14	0	30	0	0	0	0	0.78	0.94	0.47	98	1.21	0.61	36.05	28.32	64.37	2.49	1.53	5.11	7.1	2.75	2.49	2.52	1.15	2.93	0.97	1.03	0.51	113	1.06	0.53	37.33	25.27	62.59	2.17	1.07	3.86	3.76	2.73	2.17	2.02
49	Insomnia_049	Insomnia	Female	65	157	56.7	23	32.1	8	0	20	2400	0	693	3093	0.89	1.02	0.51	104	1.15	0.58	36.33	27.15	63.48	1.47	0.8	3.68	7.31	2.31	1.47	1.38	0.51	2.93	1.11	1.15	0.57	115	1.03	0.52	37.94	23.94	61.88	1.41	0.75	2.62	4.12	1.83	1.41	1.45
50	Insomnia_050	Insomnia	Female	68	164	62.8	23.3	32.4	8	0	24	0	0	0	0	0.78	1.01	0.51	92	1.3	0.65	34.71	29.63	64.35	1.09	0.69	2.7	2.99	1.55	1.09	1.06	2.67	2.55	0.97	1.13	0.57	103	1.16	0.58	35.73	27.66	63.39	1.24	0.82	2.85	3.64	2.08	1.24	1.41
51	Insomnia_051	Insomnia	Female	65	149	58.4	26.3	42	8	0	27	0	0	0	0	0.94	1.1	0.55	102	1.17	0.58	38.74	23.13	61.86	1.46	0.9	2.57	6.44	2.51	1.46	1.54	1.56	2.94	1.17	1.28	0.64	109	1.1	0.55	39.44	21.11	60.56	1.37	0.74	2.12	3.88	1.67	1.37	1.35
52	Insomnia_052	Insomnia	Female	66	155	53.9	22.4	29	14	0	30	0	0	0	0	0.61	0.94	0.47	77	1.54	0.77	33.8	32.99	66.8	2.75	1.85	6.8	9.4	4.53	2.75	2.39	1.94	4.65	0.78	0.99	0.49	95	1.27	0.63	35.13	29.23	64.36	2.79	1.71	4.78	5.52	3.65	2.79	2.7
53	Insomnia_053	Insomnia	Female	69	160	54.5	21.3	32.4	14	0	30	0	0	0	0	0.78	0.87	0.44	106	1.12	0.56	34.6	27.92	62.53	3.66	2.07	4.98	8.83	5.12	3.66	3.7	7.91	4.12	0.97	1.02	0.51	114	1.04	0.52	36.96	25.08	62.03	1.74	0.82	3.22	6.46	1.89	1.74	1.58
54	Insomnia_054	Insomnia	Female	66	148	56.4	25.7	41	14	0	25	0	0	0	0	0.78	1.02	0.51	91	1.31	0.66	39.02	24.15	63.17	2.34	1.61	6.17	12.6	3.58	2.34	2.46	5.77	4.93	0.97	1.08	0.54	107	1.11	0.56	38.96	22.93	61.89	1.76	0.88	3.12	4.37	2.09	1.76	1.58
55	Insomnia_055	Insomnia	Female	69	167	68.5	24.6	34	11	0	30	0	0	0	0	0.61	0.69	0.34	106	1.13	0.56	34.41	29.63	64.04	4.52	2.63	8.94	10.71	6.88	4.52	4.67	4.42	7.56	0.75	0.7	0.35	127	0.94	0.47	35.47	26.64	62.11	1.95	0.76	3.98	8.15	2.73	1.95	1.62
56	Insomnia_056	Insomnia	Female	68	145	51.1	24.3	34.7	11	0	28	0	0	0	0	0.89	1.02	0.51	103	1.15	0.58	36.78	26.96	63.73	3.64	2.02	6.71	11.45	4.65	3.64	3.51	1.4	4.48	1.11	1.13	0.57	117	1.02	0.51	38.4	23.51	61.92	2.23	1.21	4.93	4.14	2.75	2.23	2.38
57	Insomnia_057	Insomnia	Female	67	156	70.8	29.1	38.6	8	0	26	0	0	0	0	0.75	0.97	0.48	93	1.29	0.64	37.39	23.52	60.91	4.81	3.06	9.06	21.53	7.17	4.81	4.75	4.59	5.02	0.94	1.01	0.5	111	1.07	0.53	39.39	22.04	61.43	3.81	1.92	5	10.62	4.22	3.81	3.6
58	Insomnia_058	Insomnia	Female	68	150	55.1	24.5	33.9	14	0	27	0	0	0	0	0.67	0.91	0.46	87	1.37	0.68	34.63	30.01	64.64	2.22	1.47	9.34	13.2	4.82	2.22	2.15	2.09	2.83	0.83	0.96	0.48	104	1.15	0.57	34.97	28.47	63.44	1.38	0.73	3.09	3.93	1.8	1.38	1.27
59	Insomnia_059	Insomnia	Female	69	150	48.7	21.6	29.1	8	0	27	0	0	0	0	0.67	0.74	0.37	108	1.11	0.56	36.56	28.18	64.74	2.17	1.22	4.94	6.17	2.78	2.17	2.2	3.65	4.1	0.83	0.89	0.45	112	1.07	0.54	37.8	25.51	63.31	2.31	1.27	4.42	4.2	2.41	2.31	2.37
60	Insomnia_060	Insomnia	Female	66	158	54	21.6	28.9	8	6	30	0	480	594	1074	0.67	0.65	0.33	122	0.98	0.49	36.45	27.63	64.08	3.23	1.45	4.2	11.17	4.52	3.23	2.97	1.46	5.33	0.83	0.74	0.37	135	0.89	0.44	37.02	26.41	63.43	2.32	1.01	3.63	4.44	2.78	2.32	2.27
61	Insomnia_061	Insomnia	Female	65	158	60	24	30.9	13	0	28	2400	720	990	4110	0.5	0.76	0.38	78	1.53	0.76	34.79	31.82	66.61	5.32	4.4	10.13	13.6	9.91	5.32	5.76	4.1	3.53	0.64	0.81	0.41	93	1.27	0.64	36.11	28.12	64.22	7.05	4.44	10.82	10.41	9.9	7.05	6.98
62	Insomnia_062	Insomnia	Female	65	160	57.1	22.3	34.8	9	1	30	5760	2160	198	8118	0.56	0.85	0.42	77	1.52	0.76	32.55	31.22	63.78	10.71	8.44	19.75	23.1	18.2	10.71	11.05	10.69	8.76	0.69	0.78	0.39	106	1.13	0.56	35.2	29.6	64.8	6.85	3.95	7.58	10.61	7.77	6.85	6.99
63	Insomnia_063	Insomnia	Female	65	157	57.6	23.4	32.6	9	7	30	1440	0	990	2430	0.56	0.85	0.43	77	1.54	0.77	37.11	26.78	63.89	4.59	3.61	11.3	21.19	7.94	4.59	4.7	2.94	6.72	0.69	0.94	0.47	88	1.36	0.68	37.29	25.69	62.98	4.64	3.25	9.54	5.69	6.58	4.64	4.79
64	Insomnia_064	Insomnia	Female	66	159	65	25.7	35.1	9	19	30	2400	0	198	2598	0.89	1.01	0.5	105	1.14	0.57	38.31	22.85	61.16	5.06	2.89	4.62	9.94	6.17	5.06	5.09	1.36	3.01	1.11	1.37	0.69	97	1.24	0.62	39.2	20.65	59.85	7.99	4.94	9.18	17.9	10.48	7.99	7.99
65	Insomnia_065	Insomnia	Female	67	155	59.8	24.9	36.5	8	10	30	480	360	198	1038	1	1.22	0.61	98	1.22	0.61	38.08	24.09	62.17	2.95	1.82	5.33	10.2	3.33	2.95	2.99	0.67	9.06	1.25	1.33	0.67	112	1.06	0.53	39.26	21.95	61.21	1.63	0.88	2.65	5.38	1.88	1.63	1.65
66	Insomnia_066	Insomnia	Female	69	169	57	20	18.9	13	5	28	480	1200	792	2472	0.56	0.96	0.48	70	1.73	0.86	35.29	29.83	65.12	2.87	2.92	9.05	15.02	6.31	2.87	3.38	1.12	4	0.69	0.95	0.47	87	1.36	0.68	37.41	28.22	65.63	2.78	2.06	7.51	10.23	4.06	2.78	3.03
67	Insomnia_067	Insomnia	Female	67	153	51.8	22.1	38.4	12	16	27	800	0	0	800	0.67	0.79	0.39	101	1.18	0.59	39.16	26.45	65.61	4.21	2.32	8.77	11.08	5.34	4.21	3.94	13	7.73	0.83	0.89	0.44	112	1.06	0.53	37.71	26.4	64.12	2.17	1.06	3.66	4.83	2.84	2.17	1.99
68	Insomnia_068	Insomnia	Female	67	154	64.9	27.4	41.4	8	2	29	1200	0	396	1596	1.11	1.24	0.62	105	1.12	0.56	38.82	23.08	61.9	1.31	0.63	2.63	6.37	1.21	1.31	1.13	1.93	2.13	1.67	1.57	0.79	131	0.94	0.47	40.58	19.63	60.21	0.88	0.56	1.07	4.41	1.38	0.88	1.18
69	Insomnia_069	Insomnia	Female	65	159	64.1	25.4	30.9	8	11	30	0	120	693	813	1	1.1	0.55	109	1.1	0.55	37.25	25.07	62.33	5.09	2.69	6.34	7.19	4.91	5.09	4.89	1.12	2.73	1.25	1.16	0.58	129	0.93	0.46	37.62	24.18	61.8	4.17	1.88	5.25	7.62	3.95	4.17	4.06
70	Insomnia_070	Insomnia	Female	67	153	55.2	23.6	34.3	8	2	27	800	0	297	1097	0.75	0.9	0.45	100	1.19	0.6	36.14	28.69	64.82	3.19	1.7	5.4	5.94	3.62	3.19	2.85	2.44	6.41	0.94	1.03	0.51	110	1.09	0.54	37.67	25.91	63.58	2.08	1.1	3.72	4.16	2.75	2.08	2.02
71	Insomnia_071	Insomnia	Female	69	162	62.2	23.7	35.2	11	13	28	1600	0	297	1897	0.67	0.92	0.46	86	1.37	0.69	34.38	31.59	65.97	2.65	1.96	7.84	8.42	5.13	2.65	2.85	1.32	4.43	0.83	1	0.5	100	1.2	0.6	36.64	27.13	63.77	2.76	1.67	6.59	13.03	4.64	2.76	2.79
72	Insomnia_072	Insomnia	Female	69	145	52	24.7	35.4	8	19	27	800	0	198	998	0.67	0.79	0.4	100	1.19	0.59	35.88	27.44	63.32	3.61	2.26	5.43	6.55	3.64	3.61	3.8	2.32	4.41	0.83	0.89	0.45	111	1.07	0.54	37.65	24.49	62.14	2.58	1.52	4.4	4.77	2.85	2.58	2.84
73	Insomnia_073	Insomnia	Female	66	163	68.8	25.9	37.2	8	1	29	3840	0	99	3939	0.72	0.99	0.5	87	1.38	0.69	35.25	26.3	61.55	3.42	2.21	8.74	8.63	5.5	3.42	3.21	8.73	4.39	0.92	1.17	0.58	94	1.27	0.64	37.8	24.1	61.91	2.91	1.99	4.21	10.69	4.43	2.91	3.13
74	Insomnia_074	Insomnia	Female	65	159	59.6	23.6	30.3	11	0	30	7200	0	1409.1	8609.1	0.89	1.05	0.53	101	1.18	0.59	38	25.24	63.24	4.28	2.68	6.78	14.02	6.04	4.28	4.54	3.32	11.22	1.11	1.14	0.57	117	1.02	0.51	38.33	23.04	61.37	2.83	1.41	4.37	8.57	2.67	2.83	2.77
75	Insomnia_075	Insomnia	Female	68	154	65.5	27.6	34.6	8	3	30	2640	0	594	3234	0.72	0.97	0.48	89	1.34	0.67	37.96	23.76	61.72	2.78	2.09	6.21	11.28	4.57	2.78	3.13	0.85	4.28	0.92	1.04	0.52	105	1.13	0.57	39.55	21.47	61.01	1.82	1.05	2.99	8.18	2.5	1.82	1.86
76	Insomnia_076	Insomnia	Female	67	153	69.3	29.6	43.6	8	33	30	1200	0	1386	2586	1.03	1.25	0.63	98	1.22	0.61	37.33	24.17	61.5	1.69	0.87	3.09	5.4	2.53	1.69	1.43	3.07	2.92	1.28	1.39	0.7	110	1.09	0.55	38.88	21.67	60.56	1.04	0.63	2.29	3.8	1.47	1.04	1.16
77	Insomnia_077	Insomnia	Female	69	150	68.3	30.4	45.6	9	0	30	1120	0	693	1813	0.67	0.87	0.43	92	1.3	0.65	36.68	27.97	64.64	6.09	4.04	9.94	21.48	9.33	6.09	6.23	3.66	5.84	0.83	0.89	0.44	113	1.06	0.53	37.06	25.81	62.86	2.71	1.56	5.27	9.09	2.66	2.71	2.94
78	Insomnia_078	Insomnia	Female	71	159	55.5	22	27.3	11	3	28	0	1440	1188	2628	1	1.2	0.6	99	1.2	0.6	36.67	24.54	61.2	2.15	1.13	3.86	6.69	2.32	2.15	1.9	5.65	5.48	1.17	1.26	0.63	110	1.08	0.54	38.34	22.3	60.64	1.48	0.81	3.04	9.79	2.59	1.48	1.49
79	Insomnia_079	Insomnia	Female	71	151	56.5	24.8	38.2	9	5	25	0	1800	1980	3780	1.08	1.32	0.66	99	1.22	0.61	39.63	20.64	60.27	8.4	4.23	8.22	34.29	11.2	8.4	6.93	0.23	2.8	1.39	1.42	0.7	117	1.02	0.51	38.58	20.88	59.46	4.08	2.15	4.49	11.47	3.61	4.08	4.24
80	Insomnia_080	Insomnia	Female	74	155	49.1	20.4	31.5	9	14	29	0	0	2772	2772	0.78	0.95	0.48	97	1.23	0.61	36.26	27.37	63.63	2.08	1.42	3.68	8.29	3.07	2.08	2.31	0.29	3.87	0.97	1.06	0.53	110	1.09	0.54	38.96	23.91	62.87	1.17	0.61	2.31	4.8	1.74	1.17	1.12
81	Insomnia_081	Insomnia	Female	74	153	49.4	21.1	28.1	8	0	29	6720	3360	2772	12852	0.72	1.12	0.56	78	1.55	0.77	34.67	29.11	63.77	3.51	2.74	10.62	14.59	6.89	3.51	3.55	4.39	4.59	0.92	1.1	0.55	100	1.2	0.6	35.34	27.8	63.14	2.05	1.17	4	5.77	3.28	2.05	1.95
82	Insomnia_082	Insomnia	Female	71	160	62	24.2	32	8	8	26	0	1440	594	2034	0.72	0.92	0.46	93	1.28	0.64	35.95	27	62.95	4.14	2.86	9.31	16.24	5.32	4.14	4.47	3	5.15	0.89	0.98	0.49	109	1.1	0.55	37.03	24.87	61.89	3.87	2.16	5.74	5.62	4.84	3.87	3.94
83	Insomnia_083	Insomnia	Female	72	160	53.6	20.9	32.8	9	13	30	0	720	990	1710	0.67	0.71	0.35	113	1.06	0.53	35.81	29.06	64.86	8.36	4.44	9.02	14.77	9.53	8.36	8.38	1.89	4.05	0.83	0.72	0.36	138	0.86	0.43	36.9	26.11	63.01	1.53	0.69	2.22	5.7	1.82	1.53	1.59
84	Insomnia_084	Insomnia	Female	72	152	62	26.8	31.1	12	9	27	2880	2160	1188	6228	0.83	0.96	0.48	104	1.15	0.58	38.92	25.29	64.21	2.16	1.39	4.67	9.25	2.99	2.16	2.42	8.52	4.75	1.03	1.09	0.55	112	1.06	0.53	39.8	23.02	62.82	1.97	1.13	3.78	8.15	2.79	1.97	2.12
85	Insomnia_085	Insomnia	Female	71	161	64.4	24.8	33	9	5	27	0	2400	1188	3588	0.78	0.9	0.45	102	1.16	0.58	35.6	28.84	64.44	4.15	1.92	5.07	9.08	5.15	4.15	3.3	0.05	7.78	0.97	1.05	0.52	111	1.08	0.54	36.41	27.8	64.21	4.87	2.65	5.76	9.86	5.56	4.87	4.91
86	Insomnia_086	Insomnia	Female	74	153	58.3	24.9	33.1	8	8	30	0	960	396	1356	0.83	0.9	0.45	111	1.07	0.54	35.82	27.82	63.64	1.99	1.1	5.23	5.34	3.12	1.99	2.06	1.48	3.61	1.03	1.06	0.53	116	1.03	0.52	36.45	26.14	62.59	1.64	0.88	3.98	3.95	2.53	1.64	1.72
87	Insomnia_087	Insomnia	Female	72	155	60	25	31.7	8	1	26	0	720	1386	2106	0.78	0.92	0.46	102	1.18	0.59	33.67	30.76	64.43	4.19	2.24	9.03	16.22	6.93	4.19	3.8	5.5	5.67	0.97	1.08	0.54	108	1.11	0.55	35.77	26.47	62.25	2.14	1.27	5.06	8.81	3.1	2.14	2.29
88	Insomnia_088	Insomnia	Female	71	145	44.9	21.4	31.2	12	12	26	0	600	594	1194	0.78	1.13	0.57	82	1.46	0.73	33.2	30.97	64.18	4.36	3.13	8.35	10.29	6.64	4.36	4.28	7.59	3.4	0.97	1.1	0.55	106	1.13	0.56	35.45	28.39	63.84	1.94	1.19	3.89	4.67	2.46	1.94	2.11
89	Insomnia_089	Insomnia	Female	71	151	45.8	20.1	29.5	8	4	27	0	720	396	1116	0.72	1.05	0.52	82	1.45	0.73	34.77	30.85	65.62	4.16	3.08	7.12	9.69	6.66	4.16	4.25	1.13	4.95	0.92	1.15	0.58	95	1.26	0.63	35.67	28.89	64.56	2.28	1.43	4.05	9.01	3.69	2.28	2.27
90	Insomnia_090	Insomnia	Female	71	155	49	20.4	28.7	10	8	23	0	720	2772	3492	0.78	0.95	0.48	97	1.23	0.61	34.89	31.19	66.08	2.75	1.68	4.9	7.79	4.95	2.75	2.74	2.82	2.99	0.97	1	0.5	116	1.03	0.51	36.46	27.29	63.76	1.3	0.78	2.62	3.94	1.53	1.3	1.51
91	Insomnia_091	Insomnia	Female	74	156	66.6	27.4	35.5	14	5	29	0	720	990	1710	0.67	0.69	0.35	115	1.04	0.52	39.56	24.62	64.18	2.84	2.58	8.17	17.37	3.82	2.84	4.98	9.93	11.92	0.83	0.87	0.43	115	1.04	0.52	39.68	25.53	65.21	3.68	2.61	8.97	15.89	4.02	3.68	5.02
92	Insomnia_092	Insomnia	Female	73	148	58	26.5	26.6	14	5	27	0	1200	990	2190	0.67	0.74	0.37	107	1.11	0.56	33.75	31.65	65.4	2.01	1.1	4.66	8.8	4.04	2.01	1.98	2.48	3.7	0.83	0.86	0.43	115	1.04	0.52	34.99	29.39	64.39	1.95	0.95	4.33	7.19	2.66	1.95	1.83
93	Insomnia_093	Insomnia	Female	70	161	68	26.2	35.4	14	6	26	0	2400	990	3390	0.56	0.45	0.23	145	0.82	0.41	35.89	29.92	65.81	4.44	1.99	5.04	9.43	4.26	4.44	4.87	4.86	9.15	0.69	0.59	0.29	141	0.85	0.42	36.39	29.95	66.34	5.52	1.58	4.96	16.17	6.82	5.52	3.72
94	Insomnia_094	Insomnia	Female	71	149	61	27.5	34	8	2	30	1440	1920	660	4020	0.67	0.9	0.45	88	1.36	0.68	34.37	29.47	63.84	3.83	2.67	4.75	10.52	6.34	3.83	3.94	5.25	4.57	0.83	0.94	0.47	106	1.13	0.56	35.88	27.87	63.75	3.51	1.91	5.33	6.82	3.39	3.51	3.4
95	Insomnia_095	Insomnia	Female	70	153	52	22.2	32	9	4	29	1440	960	1386	3786	0.72	0.92	0.46	94	1.27	0.64	35.63	24.94	60.58	3.84	2.5	6.18	9.76	4.52	3.84	3.93	10.21	7.07	0.83	0.85	0.43	116	1.03	0.51	36.54	25.82	62.36	2.79	1.36	3.77	6.93	2.71	2.79	2.65
96	Insomnia_096	Insomnia	Female	72	159	60	23.7	31	11	6	30	1200	0	792	1992	0.67	0.83	0.42	96	1.25	0.62	37.06	31.95	69.01	3.69	2.98	8.08	10.87	5.97	3.69	4.77	17.89	6.7	0.92	0.95	0.48	115	1.04	0.52	37.81	28.26	66.08	4.24	2.26	7.05	11.19	5.23	4.24	4.35
97	Insomnia_097	Insomnia	Female	71	159	67	26.5	34.1	10	6	28	2000	1200	792	3992	0.78	1.22	0.61	77	1.56	0.78	39.87	22.41	62.28	4.13	3.32	7.59	12.01	7.66	4.13	4.25	5.52	4.97	0.97	1.04	0.52	112	1.07	0.54	39.39	21.54	60.93	1.59	0.81	2.62	5.74	2.38	1.59	1.51
98	Insomnia_098	Insomnia	Female	72	150	50	22.2	31	11	4	27	2800	360	990	4150	0.78	1.03	0.52	90	1.33	0.66	38.25	27.88	66.13	6.89	4.94	9.71	15.99	10.49	6.89	7.44	11.94	7.69	0.97	1.06	0.53	110	1.09	0.54	37.85	26.84	64.69	5.32	2.72	7.4	10.59	6.22	5.32	5
99	Insomnia_099	Insomnia	Female	72	148	45	20.5	20	8	3	29	1200	360	1386	2946	0.67	0.67	0.34	119	1.01	0.5	37.21	25.81	63.03	2.04	1.02	3.87	4.69	2.76	2.04	2.03	0.65	4.15	0.83	0.89	0.45	111	1.07	0.54	37.16	26.09	63.25	2.64	1.42	3.83	6.17	3.2	2.64	2.66
100	Insomnia_100	Insomnia	Female	71	158	53	21.2	21.8	14	5	26	2880	2400	1980	7260	0.67	1.11	0.56	72	1.67	0.83	32.44	35.83	68.27	2.25	1.5	8.44	10.43	5.08	2.25	1.8	2.2	5.13	0.83	1.23	0.61	80	1.47	0.74	36.37	27.38	63.75	1.91	1.37	5.67	5.62	2.88	1.91	1.87
101	Insomnia_101	Insomnia	Female	74	158	74	29.6	39.6	8	8	27	2880	2400	990	6270	0.89	1.28	0.64	83	1.44	0.72	39.2	21.56	60.75	2.05	1.5	3.35	9.07	2.39	2.05	2.08	0.13	2.28	1.11	1.43	0.71	92	1.29	0.64	39.52	20.51	60.02	4.43	2.82	7.07	10.46	5.65	4.43	4.38
102	Insomnia_102	Insomnia	Female	70	155	51	21.2	25.4	14	7	27	1440	2400	2079	5919	0.67	1.12	0.56	71	1.68	0.84	32.93	36.14	69.07	1.72	1.32	6.06	7.26	3.53	1.72	1.58	6.27	4.63	0.83	1.22	0.61	81	1.46	0.73	35.67	29.16	64.82	1.92	2.53	4.83	8.98	3.99	1.92	3.45
103	Insomnia_103	Insomnia	Female	70	147	55	25.5	33.6	14	0	26	2880	720	2376	5976	0.67	1.11	0.55	71	1.66	0.83	32.53	36.56	69.09	1.66	1.6	7.5	10.94	4.79	1.66	1.93	5.13	4.11	0.83	1.2	0.6	83	1.44	0.72	34.66	30.84	65.5	2.08	1.41	5.68	10.75	4.6	2.08	1.96
104	Insomnia_104	Insomnia	Female	72	160	54	21.1	30.9	12	10	24	0	0	495	495	0.67	1.12	0.56	71	1.68	0.84	31.57	38.04	69.62	1.72	1.17	6.82	7.78	3.78	1.72	1.4	3.84	4.02	0.83	1.24	0.62	80	1.48	0.74	34.99	29.43	64.42	2.16	1.4	5.49	10.12	3.81	2.16	1.89
105	Insomnia_105	Insomnia	Female	71	158	63	25.2	32.2	13	5	22	0	720	495	1215	0.67	1.14	0.57	70	1.71	0.86	32.24	37.42	69.66	1.99	1.67	9.78	9.7	4.45	1.99	1.95	6.1	5.44	0.83	1.24	0.62	80	1.48	0.74	34.99	30.7	65.7	1.68	1.38	5.95	9.17	3.08	1.68	1.86
106	Insomnia_106	Insomnia	Female	72	158	60	24	33	9	0	30	2400	720	693	3813	0.67	1.12	0.56	71	1.68	0.84	31.99	36.44	68.43	1.85	1.19	8.11	11.48	4.86	1.85	1.42	1.32	4.61	0.83	1.19	0.6	83	1.43	0.72	35.68	29.55	65.23	1.97	1.49	6	10.13	3.78	1.97	2.09
107	Insomnia_107	Insomnia	Female	72	164	53	19.7	24.6	12	9	26	2400	720	594	3714	0.89	1.26	0.63	84	1.42	0.71	36.94	27.82	64.77	2.42	1.8	5.96	7.54	3.38	2.42	2.53	4.73	4.83	1.11	1.35	0.67	98	1.21	0.61	38.35	24.75	63.1	1.27	0.72	3.22	6.56	1.9	1.27	1.19
108	Insomnia_108	Insomnia	Female	72	161	57	22	30.2	9	6	30	1440	480	1386	3306	0.61	0.88	0.44	83	1.45	0.72	33.62	32.28	65.9	2.15	1.63	7.05	9.68	3.25	2.15	2.25	1.28	3.68	0.78	1.14	0.57	81	1.46	0.73	34.07	31.63	65.7	1.64	1.32	5.19	9.3	3.18	1.64	1.8
109	Insomnia_109	Insomnia	Female	71	166	79	28.7	36	12	11	28	0	720	693	1413	0.72	1.05	0.52	82	1.45	0.73	33.34	32.47	65.81	2.06	1.67	6.68	7.58	3.03	2.06	2.3	2.51	4.11	0.92	1.25	0.62	88	1.36	0.68	34.89	29.74	64.63	2.41	1.56	6.07	8.07	3.61	2.41	2.3
110	Insomnia_110	Insomnia	Female	70	148	68	31	37.6	13	11	30	0	240	924	1164	0.67	0.97	0.49	82	1.46	0.73	36.36	29.24	65.6	1.82	1.32	4.58	9.23	3.63	1.82	1.81	5.56	4.06	0.83	1.22	0.61	81	1.47	0.73	36.19	29.27	65.46	1.75	1.17	5.01	7.2	3.17	1.75	1.6
111	Insomnia_111	Insomnia	Female	73	153	47	20.1	29.3	10	8	30	0	720	693	1413	0.89	1.21	0.61	87	1.37	0.68	35.87	28.74	64.61	1.93	1.22	4.53	8.17	2.9	1.93	1.79	1.37	2.97	1.11	1.34	0.67	98	1.2	0.6	38.1	24.6	62.7	2.56	1.87	4.13	4.39	3.3	2.56	3.1
112	Insomnia_112	Insomnia	Female	71	148	48	21.9	31.5	13	7	30	0	1920	1386	3306	0.81	1.2	0.6	80	1.49	0.75	34.32	31.37	65.68	2.02	1.66	9.11	8.62	4.39	2.02	2.22	0	5.31	1	1.3	0.65	91	1.3	0.65	36.53	27.22	63.75	3.32	1.49	4.57	13.23	5.43	3.32	2.3
113	Insomnia_113	Insomnia	Female	70	154	61	25.7	34.7	14	0	30	1440	720	990	3150	0.67	0.96	0.48	83	1.44	0.72	36.51	28.24	64.74	1.49	0.99	3.52	6.42	3.29	1.49	1.38	3.49	3.33	0.83	1.18	0.59	84	1.41	0.71	36.41	28.02	64.42	1.38	1.03	3.52	5.91	2.5	1.38	1.46
114	Insomnia_114	Insomnia	Female	73	158	51.6	20.7	29.5	12	12	30	1200	1200	1386	3786	1.08	1.26	0.63	103	1.16	0.58	38	23.78	61.78	1.75	1.1	2.8	4.74	2.65	1.75	1.89	0.58	2.58	1.33	1.41	0.7	113	1.06	0.53	39.62	20.57	60.19	1.55	0.78	2.37	7.25	2.05	1.55	1.48
115	Insomnia_115	Insomnia	Female	72	155	52.3	21.8	25.3	14	0	19	0	0	693	693	0.67	0.9	0.45	89	1.35	0.67	33.15	32.04	65.19	2.28	1.61	5.96	7.81	4.14	2.28	2.39	5.02	2.97	0.83	0.93	0.47	106	1.12	0.56	35.55	29.04	64.59	2.08	1.17	3.34	3.54	2.45	2.08	2.09
116	Insomnia_116	Insomnia	Female	70	152	51.2	22.2	32.1	8	0	22	0	360	231	591	0.61	0.64	0.32	114	1.04	0.52	37.18	25.22	62.41	3.56	1.47	4.33	8.93	4.56	3.56	2.83	1.1	5.55	0.78	0.78	0.39	119	1	0.5	36.84	26.42	63.26	3.57	1.87	5.31	10.51	4.45	3.57	3.72
117	Insomnia_117	Insomnia	Female	73	163	63	23.7	31.2	9	0	22	0	0	462	462	0.56	0.57	0.28	117	1.02	0.51	33.09	33.84	66.93	2.25	1.3	5.19	7.45	3.55	2.25	2.55	0.05	6.8	0.69	0.69	0.34	121	0.99	0.49	33.78	32.04	65.82	1.6	0.85	3.19	5.7	2.31	1.6	1.71
118	Insomnia_118	Insomnia	Female	70	155	59.5	24.8	28.4	8	0	30	1440	0	462	1902	0.67	0.85	0.43	93	1.28	0.64	36.77	27.06	63.83	4.47	2.66	7.33	11.09	5.24	4.47	4.15	1.63	4.88	0.83	0.94	0.47	106	1.13	0.56	37.41	25.82	63.23	1.23	0.9	3.06	3.38	2.04	1.23	1.59
119	Insomnia_119	Insomnia	Female	70	156	56.6	23.3	37.9	8	0	26	480	360	1386	2226	0.78	0.93	0.46	100	1.19	0.6	35.16	28.67	63.83	3.64	2.04	7.12	11.33	5.43	3.64	3.43	2.83	3.98	0.97	1.05	0.52	110	1.08	0.54	35.79	26.39	62.18	1.86	1	4.11	7.71	2.35	1.86	1.86
120	Insomnia_120	Insomnia	Female	70	158	58	23.2	30.5	14	0	26	0	0	0	0	0.83	1.13	0.57	90	1.36	0.68	35.78	28.23	64.01	2.13	2.47	6.8	10.85	1.95	2.13	3.64	0.58	6.38	0.92	1.08	0.53	105	1.17	0.58	37.88	24.97	62.85	2.12	0.52	2.77	5.55	3.03	2.12	0.9
121	Insomnia_121	Insomnia	Female	73	156	77.3	31.8	38	14	0	30	0	0	0	0	0.67	0.82	0.41	97	1.23	0.61	33.52	29.61	63.13	2.67	1.61	5.71	8.47	3.5	2.67	2.62	9.59	4.84	0.83	0.92	0.46	108	1.1	0.55	35.31	26.38	61.68	1.96	0.99	4.15	8.78	2.73	1.96	1.79
122	Insomnia_122	Insomnia	Female	70	154	56.6	23.9	39.5	14	0	28	0	0	0	0	0.67	0.59	0.3	134	0.89	0.44	37.53	24.39	61.92	1.76	0.72	3.47	7.98	2.33	1.76	1.62	1.46	2.84	0.83	0.73	0.36	137	0.87	0.44	37.37	25.35	62.73	2.19	0.9	3.81	6.67	2.02	2.19	2.06
123	Insomnia_123	Insomnia	Female	70	159	72.3	28.6	40	8	0	30	0	0	0	0	0.56	0.64	0.32	103	1.15	0.57	31.98	33.43	65.41	6.47	3.59	5.56	14.87	8.53	6.47	6.24	7.83	5.51	0.69	0.7	0.35	118	1.01	0.5	33.37	31.07	64.44	5.28	2.23	3.07	15.34	7.4	5.29	4.43
124	Insomnia_124	Insomnia	Female	70	148	60.4	27.6	40	14	0	30	0	0	0	0	0.89	1.1	0.55	97	1.24	0.62	35.86	24.59	60.44	3.24	1.8	6.72	7.58	3.79	3.24	2.91	10.39	5.85	1.11	1.23	0.61	108	1.11	0.55	37.04	23.06	60.1	2.49	1.39	4.01	4.96	2.56	2.49	2.51
125	Insomnia_125	Insomnia	Female	70	160	57.9	22.6	31	14	11	28	0	0	0	0	0.67	0.98	0.49	81	1.48	0.74	37.85	24.4	62.24	5.15	3.68	8.45	14.35	6.79	5.15	5	0.27	4.72	0.83	0.99	0.49	101	1.18	0.59	38.01	24.49	62.5	6.11	3.54	8.61	8.1	6.89	6.11	5.98
126	Insomnia_126	Insomnia	Female	72	158	66	26.4	42	11	0	27	0	0	0	0	0.67	0.83	0.42	96	1.25	0.62	35.17	31.23	66.4	2.62	1.77	6.11	5.25	3.95	2.62	2.84	4.57	2.86	0.83	0.93	0.46	107	1.11	0.56	36.08	27.96	64.04	4.46	2.58	6.88	6.91	5.87	4.46	4.64
127	Insomnia_127	Insomnia	Female	71	153	55.2	23.6	30	14	0	27	0	0	0	0	0.56	0.71	0.35	94	1.27	0.64	36.2	28.58	64.79	3.97	2.36	8.09	11.45	6	3.97	3.72	2.78	6.2	0.69	0.86	0.43	97	1.23	0.62	36.81	26.25	63.06	2.59	1.54	5.16	11.56	3.63	2.59	2.49
128	Insomnia_128	Insomnia	Female	71	157	55.2	22.4	34	11	0	30	0	0	0	0	0.78	1.03	0.51	91	1.32	0.66	36.42	27.5	63.92	1.86	1.29	2.61	6.27	2.51	1.86	1.96	0.95	2.69	0.97	1.15	0.58	101	1.19	0.59	37.54	24.73	62.27	1.17	0.76	3.19	4.93	1.76	1.17	1.29
129	Insomnia_129	Insomnia	Female	71	156	67.5	27.7	37	14	0	27	0	0	0	0	0.83	0.93	0.47	107	1.12	0.56	36.98	24.98	61.97	3.95	2.25	6	5.68	4.22	3.95	4.02	2.8	4.6	1.03	1.03	0.52	118	1.01	0.5	38.39	22.39	60.77	1.81	0.95	2.94	8.05	2.46	1.81	1.89
130	Insomnia_130	Insomnia	Female	71	153	50.4	21.5	31	14	0	29	0	0	0	0	0.78	0.82	0.41	113	1.05	0.53	35.21	27.78	62.99	5.02	2.24	7.05	20.94	8.18	5.02	4.27	4.98	5.36	0.97	0.89	0.45	129	0.92	0.46	35.09	24.75	59.85	6.82	1.06	2.5	21.1	8.94	6.82	2.3
131	Insomnia_131	Insomnia	Female	70	158	58.4	23.4	33	14	0	28	0	0	0	0	0.61	0.72	0.36	101	1.17	0.59	36.45	24.8	61.25	5.69	3.29	5.41	18.61	8.54	5.69	5.6	6.12	8.31	0.78	0.92	0.46	101	1.18	0.59	35.7	25.94	61.64	3.8	2.11	6.13	13.42	5.28	3.8	3.55
132	Insomnia_132	Insomnia	Female	73	157	52.7	21.4	24.8	14	0	25	0	0	0	0	0.72	0.71	0.36	121	0.99	0.49	35.52	25.5	61.03	6.14	2.52	6.6	15.18	7.43	6.14	5.11	9.26	12.16	0.83	0.84	0.42	118	1.01	0.5	33.79	31.26	65.06	2.16	1.17	4.81	8.04	3	2.16	2.32
133	Insomnia_133	Insomnia	Female	70	153	52.3	22.3	37.4	14	0	27	0	0	0	0	0.67	0.69	0.34	115	1.03	0.52	36.15	28.3	64.45	9.5	4.71	9.24	20.67	13.41	9.5	9.11	1.66	14.62	0.83	0.8	0.4	123	0.96	0.48	37.13	27.06	64.19	3.16	1.57	3.63	9.42	3.61	3.16	3.26
134	Insomnia_134	Insomnia	Female	72	146	50.3	23.6	34.9	11	0	30	0	0	0	0	0.67	0.83	0.42	95	1.25	0.62	35.12	28.01	63.13	4.8	3.18	6.8	9.4	6.66	4.8	5.09	4.87	3.81	0.83	0.87	0.44	114	1.05	0.52	35.66	27.04	62.69	2.4	1.21	3.89	4.09	2.9	2.4	2.32
135	Insomnia_135	Insomnia	Female	74	154	55.1	23.2	32.8	12	0	28	0	0	0	0	0.72	1.08	0.54	80	1.49	0.75	36.57	29.76	66.33	2.37	1.71	4.6	8.6	4.73	2.37	2.29	8.25	3.98	0.92	1.09	0.55	100	1.19	0.6	37.28	26.62	63.9	1.57	0.93	2.95	5.25	2.69	1.57	1.56
136	Insomnia_136	Insomnia	Female	72	150	60.5	26.9	33	9	0	27	0	0	0	0	0.61	0.62	0.31	118	1.01	0.5	36.06	28.36	64.43	2.71	1.41	4.99	4.53	2.73	2.71	2.8	1.39	3.36	0.75	0.7	0.35	127	0.94	0.47	37.12	25.95	63.07	2.09	0.97	2.9	3.61	2.1	2.09	2.07
137	Insomnia_137	Insomnia	Female	70	155	53	22.1	26.9	8	9	30	1920	720	1386	4026	0.61	0.8	0.4	92	1.31	0.65	35.2	29.74	64.94	5.08	3.23	8.2	7.45	5.52	5.08	4.94	0.68	6.11	0.75	0.87	0.43	103	1.16	0.58	34.32	31.27	65.59	3.91	2.34	5.85	9.16	4.87	3.91	4.03
138	Insomnia_138	Insomnia	Female	74	158	55.1	22.1	31.7	13	34	27	3600	0	264	3864	0.67	0.97	0.49	81	1.46	0.73	36.91	28.47	65.38	1.92	1.25	5.32	6.92	3.56	1.92	1.71	6.39	5.03	0.83	1.22	0.61	82	1.46	0.73	37.2	27.9	65.1	2.16	1.43	5.4	6.45	3.87	2.16	1.96
139	Insomnia_139	Insomnia	Female	73	155	60.5	25.2	42.8	8	11	29	1920	0	660	2580	0.83	1.22	0.61	81	1.46	0.73	37.25	27.52	64.76	2.15	1.45	6.43	12.18	3.9	2.15	1.98	5.56	5.68	1.03	1.32	0.66	93	1.29	0.64	38.87	23.93	62.8	1.4	0.78	3.34	7.27	2.03	1.4	1.21
140	Insomnia_140	Insomnia	Female	73	155	65.7	27.3	39	8	0	26	800	0	1188	1988	0.67	0.98	0.49	82	1.47	0.73	34.08	32.1	66.18	1.62	1.11	8.56	11.11	3.06	1.62	1.52	0.77	4.47	0.83	1.29	0.65	77	1.55	0.77	35.94	28.89	64.83	2.03	1.6	7.41	9.37	3.15	2.03	2.06
141	Insomnia_141	Insomnia	Female	70	164	62.3	23.2	35.9	11	6	30	800	0	924	1724	0.94	1.26	0.63	89	1.34	0.67	37.77	26.54	64.31	1.17	0.89	3.14	3.58	2.2	1.17	1.32	5.68	3.38	1.19	1.42	0.71	100	1.19	0.59	39.72	22.1	61.82	1.41	0.86	2.67	5.2	2.01	1.41	1.45
142	Insomnia_142	Insomnia	Female	70	161	71.5	27.6	57.8	9	8	28	4320	0	396	4716	0.67	1.13	0.57	71	1.7	0.85	32.46	37.11	69.57	1.99	1.73	10.66	11.65	4.81	1.99	2.04	6.34	5.55	0.83	1.19	0.6	84	1.43	0.72	35.86	29.86	65.72	1.67	1.05	4.76	8.86	2.94	1.67	1.48
143	Insomnia_143	Insomnia	Female	71	158	54.6	21.9	35.1	10	12	29	800	0	396	1196	0.89	1.24	0.62	86	1.39	0.7	36.87	27.64	64.51	1.52	1.07	4.78	8.54	2.22	1.52	1.54	3.82	3.97	1.11	1.34	0.67	99	1.2	0.6	38.06	24.51	62.57	1.24	0.8	3.65	6.97	1.8	1.24	1.34
144	Insomnia_144	Insomnia	Female	74	153	54.1	23.1	29.2	11	18	30	0	1200	1386	2586	0.75	1.08	0.54	83	1.44	0.72	35.07	30.7	65.78	1.63	1.23	6.52	7.62	3.38	1.63	1.71	2.46	4.24	0.94	1.26	0.63	90	1.33	0.66	36.31	27.79	64.09	4.2	1.23	3.93	19.64	7.6	4.2	1.86
145	Insomnia_145	Insomnia	Female	74	151	60.5	26.5	43.1	12	4	27	1440	0	132	1572	0.61	0.89	0.45	82	1.46	0.73	33.98	29.91	63.89	4.16	1.12	4.3	18.83	8.1	4.16	1.53	6.07	11.92	0.78	1.03	0.52	90	1.33	0.66	37.2	23.98	61.17	4.15	2.08	6.71	15.45	8.12	4.15	3.13
146	Insomnia_146	Insomnia	Female	74	154	72.8	30.7	43.7	9	0	27	800	600	1188	2588	0.75	1.04	0.52	86	1.39	0.69	35.35	29.77	65.12	2.99	2.13	8.82	9.58	6.39	2.99	3.08	1.47	7.56	0.94	1.25	0.63	90	1.33	0.66	36.31	27.75	64.06	1.37	0.86	3.19	6.83	2.42	1.37	1.3
147	Insomnia_147	Insomnia	Female	70	158	54.5	21.8	32.8	11	4	30	2400	1200	924	4524	0.78	1.24	0.62	74	1.59	0.8	35.62	30.15	65.76	1.66	1.43	9.98	11.38	4.17	1.66	1.8	4	5.1	0.97	1.29	0.64	90	1.33	0.66	36.92	27.37	64.29	1.22	0.77	3.13	5.42	2.21	1.22	1.17
148	Insomnia_148	Insomnia	Female	74	143	60	29.3	46.3	12	0	26	2000	0	495	2495	0.72	1.18	0.59	73	1.63	0.81	37.02	26.09	63.12	2.79	2.33	9.97	24.28	6.06	2.8	2.86	0.38	4.97	0.92	1.34	0.67	82	1.46	0.73	38.34	23.02	61.36	1.71	1.3	5.02	5	2.85	1.71	1.78
149	Insomnia_149	Insomnia	Female	74	160	54	21.1	26	8	0	29	720	360	495	1575	0.61	1.03	0.51	71	1.68	0.84	29.97	39.91	69.88	2.18	1.46	5.76	9.12	5.58	2.18	1.75	0.52	3.82	0.78	1.14	0.57	81	1.47	0.74	34.2	31.75	65.94	1.84	1.75	5.91	6.41	3.55	1.84	2.38
150	Insomnia_150	Insomnia	Female	74	160	52	20.3	26	9	2	24	0	0	594	594	0.67	1.04	0.52	76	1.56	0.78	33	34.07	67.07	4.92	4.38	20.91	31.02	11.19	4.92	5.59	0.42	13.72	0.83	1.19	0.6	83	1.43	0.71	35.71	29.66	65.36	2.46	1.68	9.6	13.19	4.27	2.46	2.35
151	Insomnia_151	Insomnia	Female	70	155	70	29.1	32	10	0	22	0	0	198	198	0.75	1.14	0.57	79	1.52	0.76	36.94	25.19	62.13	2.68	2.05	6.15	11.54	3.75	2.68	2.69	2.49	3.91	0.94	1.1	0.55	102	1.16	0.58	37.72	24.66	62.38	2.51	1.49	3.86	5.76	2.67	2.51	2.56
152	Insomnia_152	Insomnia	Female	72	158	56	22.4	24	8	12	30	960	0	132	1092	0.78	1.02	0.51	91	1.31	0.65	39.4	23.2	62.6	3.58	2.26	4.91	13.41	4.71	3.58	3.46	5.21	3.41	0.97	1.06	0.53	109	1.09	0.55	39.52	22.6	62.12	1.56	0.84	2.91	6.89	2.1	1.56	1.54
153	Insomnia_153	Insomnia	Female	76	159	60.2	23.8	34.4	10	0	22	0	720	2772	3492	0.78	0.88	0.44	105	1.13	0.57	34.77	30.23	65	8.49	4.77	8.77	13.06	9.65	8.49	8.44	0.64	3.57	0.97	1	0.5	116	1.03	0.51	36.14	27.91	64.05	3.45	1.8	3.45	6.9	3.63	3.45	3.51
154	Insomnia_154	Insomnia	Female	75	160	62.3	24.3	32.9	8	10	23	0	960	396	1356	0.86	0.99	0.5	103	1.15	0.58	36.65	25.89	62.54	2.25	1.33	4.35	9.18	3.69	2.25	2.31	2.06	3.47	1.03	1.1	0.55	111	1.07	0.54	37.4	24.83	62.23	2.06	1.1	3.46	4.9	2.59	2.06	2.05
155	Insomnia_155	Insomnia	Female	75	155	54	22.5	29	13	9	23	0	600	396	996	0.78	0.91	0.46	101	1.17	0.59	33.61	32.26	65.88	2.79	1.55	5.29	8.74	4.3	2.79	2.64	1.51	3.58	0.97	1.02	0.51	114	1.05	0.53	35.31	29.44	64.74	1.58	0.96	4.42	5.85	2.13	1.58	1.82
156	Insomnia_156	Insomnia	Female	78	152	57	24.7	31	8	4	30	1440	800	1188	3428	0.72	0.89	0.44	98	1.23	0.61	37.07	25.91	62.98	3.03	1.95	6.72	12.41	4.64	3.03	3.19	0.14	3.84	0.92	1.03	0.52	106	1.12	0.56	38.3	23.87	62.16	2.15	1.27	4.37	8.86	3.09	2.15	2.25
157	Insomnia_157	Insomnia	Female	75	152	61	26.4	38	12	7	28	1440	480	495	2415	0.56	0.63	0.31	105	1.13	0.57	30.97	37.69	68.66	2.95	1.65	2.49	7.03	3.52	2.95	2.91	1.2	4.57	0.69	0.72	0.36	114	1.04	0.52	32.34	36.86	69.2	2.69	1.3	2.98	4.62	2.75	2.69	2.5
158	Insomnia_158	Insomnia	Female	78	152	55	23.8	35	8	3	30	1440	600	792	2832	0.61	1.08	0.54	68	1.76	0.88	31.94	38.63	70.58	2.41	2.01	9.65	13.89	6.77	2.41	2.28	8.22	6.83	0.78	1.23	0.61	75	1.58	0.79	36.32	28.8	65.12	1.78	1.55	7.82	9.8	4.52	1.78	1.97
159	Insomnia_159	Insomnia	Female	79	154	54	22.8	30	8	6	28	1200	960	693	2853	0.72	1.15	0.57	74	1.59	0.8	34.01	33.72	67.73	1.97	1.63	7.89	8.13	4.48	1.97	2.05	5.27	5.47	0.89	1.2	0.6	88	1.36	0.68	36.38	27.81	64.2	1.51	1.03	3.91	7.34	2.74	1.51	1.52
160	Insomnia_160	Insomnia	Female	76	155	61	25.4	37	10	6	28	2400	480	462	3342	0.67	0.97	0.48	83	1.45	0.72	36.53	28.57	65.1	1.56	1.07	5.69	10.64	3.17	1.56	1.48	4.54	3.75	0.83	1.2	0.6	79	1.44	0.72	35.98	29.41	65.39	2	1.99	6.19	8.39	3.71	2	2.75
161	Insomnia_161	Insomnia	Female	75	152	62	26.8	33.2	14	5	26	2880	1440	2772	7092	0.67	1.03	0.51	78	1.54	0.77	31.29	36.23	67.52	1.99	1.51	5.47	6.28	3.76	1.99	1.97	3.75	3.76	0.83	1.18	0.59	84	1.41	0.71	32.55	32.76	65.31	2.16	1.27	4.5	7.03	4	2.16	1.81
162	Insomnia_162	Insomnia	Female	77	154	54	22.8	30.2	14	7	25	1440	2400	1980	5820	0.72	1.11	0.56	77	1.54	0.77	31.28	36.69	67.97	3.01	2.41	8.92	8.93	4.52	3.01	3.13	2.54	5.7	0.89	1.21	0.6	88	1.36	0.68	34.17	30.57	64.74	2.02	1.22	3.91	7.47	3.33	2.02	1.79
163	Insomnia_163	Insomnia	Female	77	156	58	23.8	30.8	14	4	26	1440	1440	2376	5256	0.61	1.02	0.51	71	1.68	0.84	28.23	42.68	70.91	2.45	1.97	6.8	10.12	6.46	2.45	2.35	3	5.06	0.78	1.17	0.58	79	1.5	0.75	31.69	34.99	66.68	1.8	1.52	5.59	6	3.44	1.8	2.03
164	Insomnia_164	Insomnia	Female	76	162	65	24.8	30.8	8	3	23	960	600	594	2154	0.72	1.12	0.56	77	1.55	0.77	30.52	36.9	67.42	1.87	1.28	5.23	7.6	3.78	1.87	1.65	6.54	4.27	0.89	1.16	0.58	92	1.3	0.65	33.98	30.2	64.18	1.6	1.09	3.32	5.38	2.36	1.6	1.67
165	Insomnia_165	Insomnia	Female	76	160	67	26.2	35.8	11	4	22	1440	1200	924	3564	0.67	1.05	0.53	76	1.58	0.79	33.03	36.31	69.33	2.33	1.83	6.91	12.99	5.29	2.33	2.3	7.41	9.04	0.83	1.14	0.57	87	1.37	0.68	36	29.89	65.89	1.97	1.32	4.05	8.16	3.4	1.97	1.92
166	Insomnia_166	Insomnia	Female	75	159	60	23.7	32.8	11	13	25	0	1440	792	2232	0.56	0.95	0.48	69	1.72	0.86	35.41	31.35	66.76	3.19	2.97	4.97	12.82	7.19	3.19	3.46	6.44	3.95	0.69	1.08	0.54	77	1.55	0.78	37.38	27.27	64.66	2.68	2.02	5.15	8.52	3.73	2.68	2.6
167	Insomnia_167	Insomnia	Female	79	160	50	19.5	26.5	12	6	29	0	960	495	1455	0.56	0.83	0.42	80	1.49	0.75	35.22	30.54	65.76	5.22	3.8	7.99	14.58	9.17	5.22	5.09	2.82	6.75	0.69	0.93	0.47	89	1.34	0.67	35.77	28.01	63.78	3.86	2.63	5.98	9.77	5.41	3.86	3.92
168	Insomnia_168	Insomnia	Female	76	153	53	22.6	32.8	14	6	28	1440	480	594	2514	0.56	0.76	0.38	87	1.37	0.69	33.85	31.25	65.09	3.76	3	6.98	17.53	7.11	3.76	4.37	3.21	9.51	0.69	0.85	0.42	97	1.22	0.61	35.42	29.15	64.58	2.69	1.9	6.75	12.51	4.44	2.69	3.11
169	Insomnia_169	Insomnia	Female	76	160	72.5	28.3	38.6	9	9	30	720	960	2079	3759	0.58	0.69	0.34	102	1.18	0.59	33.08	31.38	64.46	4.14	2.3	6.06	11.47	6.01	4.14	3.91	7.18	7.66	0.72	0.7	0.35	123	0.97	0.49	35.16	27	62.16	5.26	1.95	3.4	16.63	7.38	5.26	4
170	Insomnia_170	Insomnia	Female	78	151	47.6	20.9	27.7	14	11	25	480	720	924	2124	0.67	0.71	0.36	112	1.07	0.53	35.73	25.76	61.49	2.42	1.17	4.05	8.44	4.07	2.42	2.19	7.39	7.7	0.83	0.86	0.43	115	1.03	0.52	35.82	24.71	60.53	3.27	1.44	4.56	10.95	3.52	3.27	2.79
171	Insomnia_171	Insomnia	Female	76	155	67.8	28.2	42.8	14	0	21	0	0	0	0	0.67	0.9	0.45	88	1.35	0.68	35.91	30.84	66.74	6.79	4.79	10.85	12.8	9.89	6.79	7.09	7.75	8.33	0.83	1.16	0.58	85	1.39	0.7	35.75	27.62	63.37	2.45	1.76	5.32	8.61	4.44	2.45	2.53
172	Insomnia_172	Insomnia	Female	77	158	50.8	20.3	19.6	8	0	21	0	1200	693	1893	0.53	0.88	0.44	72	1.66	0.83	33.88	31.5	65.38	3.1	2.37	13.29	24.78	9.14	3.1	2.85	2.17	7.19	0.67	0.93	0.46	85	1.39	0.7	34.57	29.39	63.96	5.74	3.9	9.02	20.93	11.52	5.74	5.61
173	Insomnia_173	Insomnia	Female	75	159	54.6	21.6	19.1	8	0	22	0	1200	0	1200	0.78	0.86	0.43	109	1.1	0.55	38.76	23.5	62.26	1.43	0.77	3.4	7.15	2.53	1.43	1.39	2.68	2.91	0.97	1.03	0.51	113	1.06	0.53	39.28	21.93	61.21	1.69	0.87	3.06	4.58	2.08	1.69	1.65
174	Insomnia_174	Insomnia	Female	75	158	43.4	17.4	18.5	8	0	22	0	600	231	831	0.67	0.67	0.33	119	1	0.5	36.48	30.17	66.65	5.69	2.96	7.11	10.8	5.39	5.69	5.9	8.97	5.24	0.83	0.78	0.39	128	0.93	0.47	38.39	26.88	65.27	2.24	1.2	3.25	3.69	2.29	2.24	2.57
175	Insomnia_175	Insomnia	Female	77	148	51.1	23.3	27.8	11	0	17	0	480	693	1173	0.56	0.95	0.48	70	1.71	0.86	32.82	34.59	67.42	3.01	2.49	7.21	8.25	4.9	3.01	2.9	0.73	2.89	0.69	0.87	0.44	94	1.26	0.63	35.76	29.2	64.95	2.41	1.42	4.1	6.59	2.96	2.41	2.26
176	Insomnia_176	Insomnia	Female	75	153	65	27.8	34.3	9	0	26	0	0	0	0	0.78	0.96	0.48	97	1.23	0.61	35.37	29.85	65.22	1.57	0.94	5.01	8.44	2.72	1.57	1.54	1.68	3.06	0.97	1.05	0.52	111	1.08	0.54	37.09	26.48	63.57	1.46	0.78	3	4.39	1.63	1.46	1.45
177	Insomnia_177	Insomnia	Female	79	138	41.2	21.6	35	8	0	30	0	0	0	0	0.67	0.88	0.44	90	1.33	0.66	35.46	29.16	64.62	2.93	2.15	5.03	11.16	5.37	2.93	3.24	0.2	3.26	0.83	0.92	0.46	109	1.1	0.55	36.38	26.07	62.46	1.59	0.91	3.47	6.96	2.28	1.59	1.66
178	Insomnia_178	Insomnia	Female	77	148	67.9	31	43	8	0	28	0	0	0	0	1.25	1.25	0.63	118	1	0.5	40.9	18.14	59.03	1.09	0.55	2.1	6.46	1.49	1.09	1.11	0.17	1.79	1.39	1.5	0.75	110	1.08	0.54	40.61	18.6	59.22	1.22	0.57	2.52	4.74	1.65	1.22	1.07
179	Insomnia_179	Insomnia	Female	75	152	50.7	21.9	41	14	0	27	0	0	0	0	0.56	0.59	0.3	112	1.07	0.53	34.21	32.51	66.72	2.48	1.98	7.22	11.61	3.46	2.48	3.71	2.77	6.18	0.69	0.67	0.34	123	0.97	0.48	35.17	30.07	65.24	2.97	1.71	6.59	9.15	3.71	2.97	3.53
180	Insomnia_180	Insomnia	Female	78	148	53.2	24.3	41	12	0	30	0	0	0	0	0.89	1.01	0.5	105	1.14	0.57	36.38	27.25	63.62	2.5	1.45	3.21	4.24	2.81	2.5	2.55	0	2.78	1.11	1.08	0.54	122	0.98	0.49	37.54	24.37	61.91	1.14	0.55	2.12	4.78	1.38	1.14	1.12
181	Insomnia_181	Insomnia	Female	78	151	64.8	28.4	39	14	0	26	0	0	0	0	0.83	0.99	0.5	100	1.19	0.6	39.07	21.85	60.92	1.66	0.92	3.53	9.28	2.57	1.66	1.55	0.04	3.44	1.06	1.13	0.57	111	1.07	0.54	39.36	20.7	60.06	1.49	0.82	2.88	4.48	2.1	1.49	1.53
182	Insomnia_182	Insomnia	Female	78	156	58.5	24	34	14	0	30	0	0	0	0	0.72	0.77	0.39	112	1.07	0.53	35.8	29.35	65.15	3.37	1.93	5.78	10.38	4.31	3.37	3.61	2.7	5.87	0.92	0.97	0.49	112	1.06	0.53	36.71	26.96	63.67	3.11	1.69	6.23	9.91	3.5	3.11	3.17
183	Insomnia_183	Insomnia	Female	76	161	56.9	22	27.9	11	0	25	0	0	0	0	0.72	0.93	0.46	93	1.28	0.64	34.45	27.56	62.01	2.49	1.64	5.49	7.09	3.75	2.49	2.56	9.78	5.6	0.89	0.93	0.47	113	1.05	0.52	36.25	25.99	62.24	2.8	1.49	3.49	6.91	2.79	2.8	2.84
184	Insomnia_184	Insomnia	Female	77	150	66.8	29.7	44	14	0	30	0	0	0	0	0.61	0.7	0.35	104	1.14	0.57	36.48	28.75	65.23	3.44	1.4	3.81	9.69	4.76	3.44	2.45	4.87	5.9	0.75	0.82	0.41	109	1.09	0.55	37.07	27.88	64.95	1.57	0.69	2.8	5.37	2.01	1.57	1.27
185	Insomnia_185	Insomnia	Female	77	150	58.1	25.8	33	14	0	26	0	0	0	0	0.61	0.75	0.38	97	1.23	0.62	32.69	31.46	64.15	4.12	2.44	6.78	9.8	5.94	4.12	3.97	9.23	5.91	0.75	0.8	0.4	112	1.07	0.53	33.99	30.35	64.33	1.78	1.54	5.13	7.73	2.21	1.78	2.89
186	Insomnia_186	Insomnia	Female	77	149	57.8	26	32	14	0	28	0	0	0	0	0.78	0.94	0.47	99	1.2	0.6	39.06	24.92	63.98	2.39	1.42	4.97	7.16	3.68	2.39	2.36	8.09	6.28	0.97	1.09	0.54	106	1.12	0.56	40.24	21.43	61.67	1.76	0.88	3.06	5.78	2.24	1.76	1.58
187	Insomnia_187	Insomnia	Female	78	156	58.1	23.9	33	14	0	30	0	0	0	0	0.61	0.81	0.4	90	1.32	0.66	33.19	32.26	65.45	5.93	3.86	12.23	9.48	9.07	5.93	5.85	4.17	6.3	0.78	0.72	0.36	128	0.92	0.46	34.22	30.68	64.9	10.49	4.92	6.89	14.95	9.75	10.49	10.65
188	Insomnia_188	Insomnia	Female	78	153	71.8	30.7	41.7	14	0	26	0	0	0	0	0.78	0.87	0.44	107	1.12	0.56	36.08	25.91	62	4.12	2.17	6.78	14.7	5.13	4.12	3.87	5.21	5.01	0.97	0.99	0.5	117	1.02	0.51	37.18	24.33	61.52	2.57	1.31	4.58	3.56	2.79	2.57	2.56
189	Insomnia_189	Insomnia	Female	76	160	60.5	23.6	35.3	14	11	27	1200	0	2772	3972	0.67	0.89	0.45	89	1.34	0.67	34.6	29.01	63.61	3.53	2.39	5.91	12.9	5.4	3.53	3.57	4.65	3.88	0.83	1.01	0.5	98	1.21	0.6	35.56	27.18	62.74	3.1	1.74	5.51	6.13	3.84	3.1	2.88
190	Insomnia_190	Insomnia	Female	76	152	52.5	22.7	37.2	11	14	30	2000	0	2079	4079	0.94	1	0.5	113	1.06	0.53	35.84	27.45	63.3	2.68	1.3	3.43	4.84	3.36	2.68	2.46	2.37	2.38	1.19	1.21	0.6	119	1.01	0.5	36.99	25.8	62.79	3.58	1.79	3.53	6.96	3.84	3.58	3.55
191	Insomnia_191	Insomnia	Female	75	163	56.4	21.2	24.7	11	9	30	2880	0	924	3804	0.67	0.83	0.42	96	1.25	0.62	35.51	28.94	64.45	3.29	2.05	7.09	10.39	4.73	3.29	3.28	0.1	4.59	0.83	1.02	0.51	98	1.22	0.61	37.27	25.2	62.47	2.7	1.74	6.88	11.6	3.22	2.7	2.85
192	Insomnia_192	Insomnia	Female	76	160	69	27	38.6	11	12	24	2000	0	330	2330	0.92	1.09	0.55	100	1.19	0.6	35.52	26.26	61.78	1.35	0.84	2.33	3.96	1.94	1.35	1.42	7.34	4.86	1.14	1.22	0.61	112	1.07	0.53	38.17	22.98	61.15	1.22	0.52	2.04	3.62	1.47	1.22	0.98
193	Insomnia_193	Insomnia	Female	77	153	50	21.4	23	8	0	24	0	0	1386	1386	0.67	0.94	0.47	84	1.42	0.71	37.53	27.51	65.05	3.56	2.46	6.17	8.88	4.47	3.56	3.47	7.13	2.77	0.83	0.91	0.46	109	1.09	0.55	38.69	24.88	63.57	4.85	2.81	7.21	7.36	4.77	4.85	5.14
194	Insomnia_194	Insomnia	Female	83	153	54.9	23.5	35	9	5	26	0	1200	1980	3180	0.81	1.03	0.52	93	1.28	0.64	36.29	27.08	63.37	3.94	2.42	7.89	5.5	5.5	3.94	3.77	0.98	3.75	1	1.19	0.59	100	1.19	0.59	38.41	22.46	60.87	1.64	1.08	3.68	8.28	2.39	1.64	1.83
195	Insomnia_195	Insomnia	Female	80	161	66	25.5	3	13	2	30	1440	1200	1155	3795	0.44	0.78	0.39	68	1.76	0.88	36.44	26.1	62.54	5.06	2.23	11.07	24.04	9.77	5.06	2.53	2.75	7.69	0.56	0.7	0.35	95	1.25	0.63	36.38	26.73	63.1	4.64	2.84	6.92	9.19	6.49	4.64	4.53
196	Insomnia_196	Insomnia	Female	80	155	65.4	27.2	41	10	0	30	0	0	0	0	0.72	0.88	0.44	98	1.22	0.61	36.93	27.74	64.67	2.54	1.39	7.08	7.7	4.94	2.54	2.27	4.44	5.05	0.89	0.98	0.49	107	1.11	0.55	38.39	25.25	63.64	2.36	1.16	4.73	10.59	3.59	2.36	2.1
197	Insomnia_197	Insomnia	Female	84	159	73.8	29.2	35	14	0	30	0	0	0	0	0.67	0.84	0.42	95	1.26	0.63	33.86	30.5	64.36	2.62	2.19	6.71	8.68	4.93	2.62	3.47	5.13	6.48	0.83	1.02	0.51	98	1.22	0.61	34.6	28.47	63.07	2.5	1.27	4.97	8.22	3.33	2.5	2.08
198	Insomnia_198	Insomnia	Female	80	144	58.6	28.3	36.7	11	0	30	0	0	0	0	0.56	0.6	0.3	112	1.07	0.54	36.02	28.21	64.24	3.43	1.39	6.77	12.41	5.29	3.43	2.59	0.71	6.54	0.69	0.68	0.34	122	0.98	0.49	36.72	27.04	63.76	3.2	1.11	4.87	9.17	3.5	3.2	2.27
199	Insomnia_199	Insomnia	Female	83	155	43.9	18.3	22.9	14	0	27	0	0	0	0	0.56	0.71	0.35	93	1.28	0.64	31.85	34.27	66.12	4.63	2.82	7.74	15.12	7.05	4.63	4.42	6.19	5.44	0.69	0.8	0.4	104	1.15	0.58	33.92	31.97	65.89	3.49	1.82	4.37	7.85	4.26	3.49	3.15
200	Insomnia_200	Insomnia	Female	85	167	63.6	22.8	27	10	0	26	0	0	0	0	0.78	0.87	0.44	106	1.12	0.56	35.29	29.31	64.6	5.53	3.02	8.28	15.02	7.48	5.53	5.39	0.3	4.87	0.97	1.05	0.53	110	1.08	0.54	36.92	27.36	64.29	2.31	1.25	2.83	5.64	2.91	2.31	2.31
201	Insomnia_201	Insomnia	Female	88	145	59.4	28.3	44.6	14	0	22	0	0	0	0	0.78	1.03	0.52	89	1.33	0.67	38.26	23.96	62.23	2.5	1.72	4.51	9.48	3.87	2.5	2.58	1.29	3.15	0.97	1.05	0.53	111	1.08	0.54	39.56	21.78	61.34	1.55	0.89	2.35	4.57	1.77	1.55	1.64
202	Insomnia_202	Insomnia	Female	81	181	65	19.8	21	8	0	21	0	0	396	396	0.67	0.85	0.43	93	1.28	0.64	34.12	33.35	67.47	6.58	3.77	13.19	18.42	8.86	6.58	5.89	4.75	12.41	0.83	0.94	0.47	106	1.13	0.57	35.24	32.2	67.44	8.38	3.71	11.65	18.45	10.33	8.38	6.54
203	Controls_001	Controls	Female	66	157	55.3	22.4	23.4	1	0	29	0	480	924	1404	0.67	0.81	0.41	98	1.22	0.61	34.98	29.89	64.86	3.77	2.27	4.82	13.34	5.81	3.77	3.73	0.45	5.5	0.83	0.92	0.46	107	1.11	0.56	36.04	28.85	64.89	4.38	2.42	5.05	12.28	5.98	4.38	4.35
204	Controls_002	Controls	Female	67	150	58.2	25.9	34.8	0	2	26	0	800	924	1724	0.86	0.96	0.48	108	1.11	0.55	35.72	28.25	63.97	4.39	2.4	5.54	8.01	4.78	4.39	4.33	0.87	4.53	1.08	1.18	0.59	109	1.09	0.54	36.89	25.32	62.21	1.59	0.89	3.01	4.51	2.4	1.59	1.63
205	Controls_003	Controls	Female	67	157	62.8	25.5	30	7	31	30	1440	960	1386	3786	0.5	0.58	0.29	104	1.15	0.58	34.99	28.4	63.39	9.74	7.79	20.52	37.77	14.91	9.74	13.54	4.51	21.06	0.64	0.66	0.33	116	1.03	0.52	33.05	32.26	65.31	3.29	1.64	4.66	9.87	4.36	3.29	3.17
206	Controls_004	Controls	Female	65	163	64.1	24.1	28	2	2	24	0	1200	1584	2784	0.78	0.79	0.4	117	1.02	0.51	35.36	25.74	61.09	2.53	1.22	4.3	8.52	3.09	2.53	2.39	9.56	5.9	0.97	0.93	0.46	126	0.95	0.48	35.58	25.01	60.6	1.57	0.93	3.1	3.58	1.94	1.57	1.95
207	Controls_005	Controls	Female	66	158	54.9	22	16.6	2	0	25	0	1600	2178	3778	0.78	1.03	0.52	90	1.33	0.66	37.2	27.05	64.25	2.47	1.59	5.13	8.26	4.43	2.47	2.4	3.98	3.39	0.97	1.11	0.55	105	1.14	0.57	37.13	26.39	63.51	2.03	1.1	2.95	6.26	2.45	2.03	1.93
208	Controls_006	Controls	Female	65	161	69.9	27	20.1	0	0	28	1200	600	990	2790	0.78	0.85	0.42	109	1.09	0.55	38.26	26.34	64.6	2.52	1.4	4.27	5.63	3.03	2.52	2.56	7.78	4.25	0.97	0.91	0.46	127	0.94	0.47	36.42	28.08	64.49	3.36	1.57	5.83	5.37	4.14	3.36	3.34
209	Controls_007	Controls	Female	67	165	55.6	20.4	15.3	1	3	26	0	0	693	693	0.69	0.92	0.46	91	1.32	0.66	38.63	24.81	63.44	4.4	3.12	10.79	9.79	7.96	4.4	4.73	5.49	4.9	0.83	1.04	0.52	96	1.25	0.62	36.76	27.79	64.55	4.54	3.05	7.72	13.45	6.75	4.54	4.9
210	Controls_008	Controls	Female	66	158	62.3	25	34.5	0	2	27	0	720	297	1017	0.81	0.83	0.42	115	1.04	0.52	34.01	32.45	66.46	4.46	2.33	4.3	8.16	5.38	4.46	4.49	1.38	3.87	1	0.95	0.48	125	0.95	0.48	36.08	28.57	64.65	1.85	0.83	2.71	4.56	2.32	1.85	1.76
211	Controls_009	Controls	Female	68	155	57.7	24	33.8	0	0	28	2400	1200	990	4590	0.67	0.71	0.36	111	1.07	0.54	32.9	31.47	64.37	3.17	1.72	5.29	4.81	3.08	3.17	3.2	7.98	4.73	0.83	0.89	0.44	112	1.06	0.53	35.12	29.56	64.67	2.1	1.04	4.47	7.66	2.66	2.1	1.96
212	Controls_010	Controls	Female	66	148	43.3	19.8	30	0	0	26	0	1200	495	1695	0.67	0.87	0.43	91	1.3	0.65	36.05	27.05	63.1	2.56	2.08	9.83	13.2	5.63	2.56	3.2	2.35	4.77	0.83	0.92	0.46	108	1.11	0.55	37.05	24.42	61.47	1.87	0.95	3.45	7.25	2.63	1.87	1.72
213	Controls_011	Controls	Female	67	164	65.8	24.5	31.2	1	8	27	2880	3360	2772	9012	0.67	0.69	0.34	115	1.03	0.52	35.54	30.1	65.64	3.8	1.78	5.44	13.18	4.89	3.8	3.45	3.36	5.14	0.83	0.77	0.39	129	0.93	0.46	36.1	27.77	63.87	4.36	2	7.08	7.27	5	4.36	4.3
214	Controls_012	Controls	Female	66	153	51	21.8	28.1	4	4	26	2400	3360	2772	8532	0.56	0.58	0.29	113	1.05	0.53	35.51	29.37	64.87	1.88	0.86	3.31	6.81	2.54	1.88	1.64	1.08	3.27	0.69	0.67	0.33	124	0.96	0.48	36.49	28.9	65.4	2.28	1.13	2.48	5.17	2.54	2.28	2.36
215	Controls_013	Controls	Female	68	143	49.1	24	31.8	2	1	28	0	1200	495	1695	0.75	0.79	0.4	113	1.06	0.53	33.96	33.02	66.98	2.88	1.4	8.48	11.67	3.7	2.88	2.65	2.83	5.35	0.94	0.96	0.48	117	1.02	0.51	35.64	28.54	64.19	4.5	2.22	6.68	4.55	4.54	4.5	4.35
216	Controls_014	Controls	Female	68	155	51	21.2	28	7	7	26	2880	3600	1980	8460	0.72	0.83	0.42	104	1.15	0.58	35.95	28.18	64.13	1.22	0.72	3.16	4.15	1.75	1.22	1.24	0.24	3.79	0.92	0.92	0.46	119	1	0.5	36.24	27.17	63.41	1.22	0.71	2.56	5.41	1.83	1.22	1.43
217	Controls_015	Controls	Female	67	151	70	30.7	36.5	0	7	26	0	2400	1980	4380	0.75	0.93	0.47	96	1.25	0.62	35.58	30.97	66.55	4.59	2.81	7.15	9.56	5.9	4.59	4.51	6.18	4	0.94	0.95	0.47	119	1	0.5	36.23	28.4	64.63	1.66	0.88	3.23	6.14	2.23	1.66	1.76
218	Controls_016	Controls	Female	67	163	68.3	25.7	35	0	1	26	2880	3600	2970	9450	0.56	0.56	0.28	118	1	0.5	33.65	33.36	67	1.57	0.78	3.1	4.02	2.02	1.57	1.56	1.96	3.29	0.69	0.69	0.34	121	0.99	0.49	39.39	26.44	65.83	2.61	2.62	9.63	16.04	2.89	2.61	5.31
219	Controls_017	Controls	Female	68	153	60	25.6	32.3	2	0	29	0	1200	2772	3972	0.44	0.55	0.28	96	1.25	0.62	37.13	28	65.12	5.38	4.46	15	22.11	8.1	5.38	7.15	5.69	12.49	0.56	0.59	0.3	112	1.07	0.53	38.29	24.7	62.99	9.62	5.7	11.74	31.5	12.07	9.62	10.69
220	Controls_018	Controls	Female	67	159	61	24.1	30	0	2	27	2880	3600	2970	9450	0.44	0.86	0.43	62	1.93	0.97	35.37	27.24	62.61	1.87	2.14	6.99	19.9	7.98	1.87	2.21	5.54	4.62	0.56	0.62	0.31	106	1.12	0.56	34.81	29.1	63.9	7.68	4.39	12.72	9.27	8.98	7.68	7.83
221	Controls_019	Controls	Female	69	151	53.5	23.5	32.7	3	2	29	0	1200	990	2190	0.78	0.93	0.47	100	1.2	0.6	35.61	26.09	61.7	3.36	1.97	6.97	13.47	4.61	3.36	3.28	7.28	5.53	0.97	1.06	0.53	109	1.09	0.55	36.43	25.14	61.57	2.89	1.59	4.55	6.67	3.32	2.89	2.91
222	Controls_020	Controls	Female	66	149	62	27.9	29	1	0	26	0	600	528	1128	0.78	1.14	0.57	82	1.47	0.73	41.54	17.63	59.16	2.95	2.34	6.14	9.4	4.88	2.95	3.18	1.7	3.15	0.97	1.11	0.55	105	1.14	0.57	40.48	18.93	59.4	2.02	1.25	3.13	6.97	2.85	2.02	2.19
223	Controls_021	Controls	Female	66	148	55	25.1	31.6	3	3	30	0	600	990	1590	0.69	0.86	0.43	96	1.24	0.62	34.13	27.9	62.03	3.41	2.01	7.63	12.76	6.63	3.41	3.26	10.63	5.77	0.86	0.88	0.44	117	1.02	0.51	36.51	25.51	62.03	2.63	1.39	3.39	8.21	3.39	2.63	2.72
224	Controls_022	Controls	Female	67	155	53	22.1	22.9	7	2	27	0	2400	2970	5370	0.81	1.09	0.54	89	1.35	0.68	40.45	27.51	67.96	2.06	1.47	5.35	7.76	3.13	2.06	2.18	23.33	10.08	1	1.18	0.59	101	1.18	0.59	41.03	26.2	67.24	1.37	0.84	2.6	3.18	1.63	1.37	1.43
225	Controls_023	Controls	Female	69	160	65	25.4	33.4	4	3	26	2880	2400	2970	8250	0.67	0.67	0.34	118	1.01	0.51	37.72	24.74	62.45	3.13	2.07	6.76	14	4.7	3.13	4.08	0.32	7.94	0.83	0.83	0.41	120	0.99	0.5	36.91	26.87	63.79	1.34	0.82	2.56	4	1.58	1.34	1.65
226	Controls_024	Controls	Female	68	152	55	23.8	30.2	6	4	25	0	600	1188	1788	0.75	0.94	0.47	95	1.26	0.63	33.35	32.55	65.91	2.71	1.78	5.55	9.12	3.99	2.71	2.84	2.21	4.63	0.94	1.08	0.54	105	1.14	0.57	35.6	28.41	64.01	1.64	0.95	2.84	6.24	2.43	1.64	1.67
227	Controls_025	Controls	Female	66	154	47	19.8	24.4	2	0	30	0	600	1386	1986	0.44	0.49	0.25	108	1.11	0.56	34.45	28.81	63.26	3.72	3.05	11.24	15.56	5.77	3.72	5.49	6.36	11.64	0.56	0.53	0.27	124	0.96	0.48	38.1	24.48	62.58	3.43	2.75	12.42	22.06	4.7	3.43	5.73
228	Controls_026	Controls	Female	65	149	51	23	29	0	5	27	0	2400	1980	4380	0.67	0.68	0.34	117	1.02	0.51	34.82	29.75	64.57	2.05	1.1	3.22	5.08	2.68	2.05	2.16	1.73	3.45	0.83	0.81	0.41	122	0.98	0.49	36.47	26.24	62.71	1.46	0.64	2.55	4.01	1.84	1.46	1.32
229	Controls_027	Controls	Female	68	156	62	25.5	32	1	0	29	0	0	1980	1980	0.56	0.69	0.35	96	1.25	0.62	34.54	31.31	65.85	2.58	1.62	4.26	6.12	3.41	2.58	2.59	1.14	3.22	0.69	0.8	0.4	103	1.16	0.58	35.46	28.28	63.74	2.16	1.22	4.12	6.63	2.92	2.16	2.11
230	Controls_028	Controls	Female	68	153	61.5	26.3	39.7	0	0	30	0	1200	2772	3972	0.75	0.99	0.49	90	1.32	0.66	34.55	29.87	64.42	3.19	2.01	5.49	6.32	3.12	3.19	3.06	3.14	3.05	0.94	0.99	0.49	114	1.04	0.52	35.74	27.98	63.72	1.55	0.81	2.47	3.2	2.17	1.55	1.55
231	Controls_029	Controls	Female	68	152	60.6	26.2	36.7	6	0	26	0	0	0	0	0.61	0.85	0.43	86	1.4	0.7	34.09	30.17	64.27	3.78	2.55	7.36	15.39	7.01	3.78	3.65	4.71	3.6	0.78	0.85	0.43	109	1.1	0.55	36.34	26.96	63.3	2.81	1.53	2.94	7.04	3.36	2.81	2.79
232	Controls_030	Controls	Female	69	166	63.1	22.9	33.4	5	0	30	0	1200	495	1695	0.67	0.84	0.42	95	1.26	0.63	38.04	23.12	61.17	1.37	1.07	4.29	5.48	2.82	1.37	1.69	2.06	3.54	0.83	1.06	0.53	94	1.28	0.64	38.11	23.41	61.52	1.64	1.15	3.77	9.32	3.08	1.64	1.8
233	Controls_031	Controls	Female	65	155	74.7	31.1	40.9	5	0	30	0	600	1386	1986	0.56	0.78	0.39	85	1.4	0.7	33.2	34.1	67.3	2.9	1.56	7.14	10.05	4.66	2.9	2.22	1.53	4.58	0.69	0.73	0.36	115	1.04	0.52	32.47	31.8	64.27	1.94	1.03	3.67	5.4	2.36	1.94	1.98
234	Controls_032	Controls	Female	68	161	60	23.1	25.5	5	0	26	0	2400	693	3093	0.56	0.89	0.44	74	1.6	0.8	30.66	34.97	65.63	4.07	3.32	7.12	13.09	7.7	4.07	4.14	11.43	4.97	0.69	0.88	0.44	95	1.27	0.63	32.03	33.32	65.35	1.87	1.11	5.65	6.15	2	1.87	1.76
235	Controls_033	Controls	Female	68	162	72.1	27.5	37.4	4	0	26	2400	600	1386	4386	0.67	0.76	0.38	105	1.15	0.57	36.67	26.8	63.47	2.1	1.2	3.72	8.75	2.79	2.1	2.1	0.37	2.91	0.83	0.89	0.45	112	1.07	0.53	36.95	25.58	62.53	1.72	0.91	2.98	7.26	2.49	1.72	1.7
236	Controls_034	Controls	Female	67	158	61.8	24.8	38.9	0	0	24	0	1200	495	1695	0.67	0.72	0.36	112	1.07	0.54	37.28	27.38	64.66	2.18	1.1	2.23	6.88	2.75	2.18	2.06	5.36	3.48	0.83	0.79	0.4	125	0.95	0.48	38.28	25.56	63.85	1.72	0.92	2.53	4.54	1.84	1.72	1.94
237	Controls_035	Controls	Female	69	159	57.2	22.6	36.4	7	0	21	0	1200	1386	2586	1.03	1.22	0.61	101	1.18	0.59	37.71	25.19	62.91	1.52	0.91	2.97	3.98	2.08	1.52	1.54	1.66	2.6	1.28	1.27	0.63	120	0.99	0.5	38.57	23.1	61.67	1.59	0.69	2.41	3.6	1.6	1.59	1.4
238	Controls_036	Controls	Female	67	153	54.4	23.2	30.4	7	0	25	0	0	231	231	0.78	1.12	0.56	83	1.44	0.72	34.83	30.79	65.62	2.43	1.56	7.35	13.35	4.66	2.43	2.17	1.3	5.32	0.97	1.21	0.61	96	1.25	0.62	36.69	26.66	63.35	1.38	0.88	3.13	6.64	2.38	1.38	1.41
239	Controls_037	Controls	Female	69	146	58.9	27.6	31.5	0	0	30	0	0	0	0	0.78	1.19	0.59	78	1.53	0.76	33.22	35.38	68.6	1.88	1.22	5.59	9.1	4.2	1.88	1.6	5.27	4.11	0.94	1.28	0.64	88	1.35	0.68	36.44	28.34	64.78	1.44	1.01	3.79	4.25	2.63	1.44	1.49
240	Controls_038	Controls	Female	69	148	55.3	25.2	31.8	0	0	30	0	0	0	0	0.78	1.2	0.6	78	1.54	0.77	35.43	31.3	66.73	1.49	1.15	5.04	7.05	2.5	1.49	1.49	6.27	4.82	0.97	1.31	0.66	89	1.35	0.67	37.47	26	63.47	1.1	0.68	2.72	6.55	2.31	1.1	1.01
241	Controls_039	Controls	Female	66	157	67.6	27.4	32.8	0	0	30	0	0	0	0	0.89	1.2	0.6	88	1.35	0.68	35.94	29.17	65.11	1.54	1.12	3.18	4.46	2.15	1.54	1.66	2.96	2.61	1.11	1.31	0.66	101	1.18	0.59	37.95	25.54	63.49	4.77	3.99	3.52	14.31	7.58	4.77	6.73
242	Controls_040	Controls	Female	65	140	46.9	23.9	33.8	0	0	25	0	960	396	1356	0.94	1.2	0.6	93	1.27	0.64	34.34	29.65	63.99	1.28	0.92	2.87	4.53	2.36	1.28	1.45	4.76	2.75	1.17	1.36	0.68	102	1.17	0.58	36.27	26.19	62.46	1.32	0.74	2.08	3.42	1.95	1.32	1.26
243	Controls_041	Controls	Female	65	150	45.5	20.2	32.4	0	0	30	0	0	0	0	0.78	1.07	0.54	86	1.38	0.69	37.38	23.24	60.62	1.82	1.35	4.53	13.85	4.12	1.82	1.96	5.22	4.58	0.97	1.27	0.64	91	1.31	0.66	34.88	29.2	64.08	5.17	5.06	6.87	15.1	9.84	5.17	7.68
244	Controls_042	Controls	Female	65	155	59.9	24.9	30.6	0	0	26	0	0	1386	1386	0.83	1.21	0.6	82	1.45	0.72	36.15	29.1	65.25	1.96	1.32	3.82	8.23	3.14	1.96	1.82	4.09	3.86	1.06	1.32	0.66	96	1.25	0.62	38.27	25.03	63.3	1.86	1.21	3.02	6.17	2.9	1.86	1.94
245	Controls_043	Controls	Female	66	156	58.6	24.1	30.6	5	0	25	0	1200	495	1695	0.78	1.15	0.57	81	1.48	0.74	35.17	30.32	65.49	1.35	1.35	4.82	6.96	3.47	1.35	1.82	1.89	4.1	0.97	1.26	0.64	89	1.3	0.65	37.61	25.74	63.34	3.69	4.65	2.4	12.49	5.69	3.69	7.1
246	Controls_044	Controls	Female	67	150	58.2	25.9	35.1	0	0	30	0	1600	495	2095	0.89	1.19	0.6	89	1.34	0.67	36.62	28.3	64.92	1.21	0.75	2.74	5.47	1.91	1.21	1.11	4.3	2.97	1.06	1.28	0.64	98	1.22	0.61	38.39	24.61	63	1.65	1.69	2.64	3.8	2.36	1.65	2.77
247	Controls_045	Controls	Female	69	161	68.6	26.5	36	0	0	30	0	0	0	0	0.78	1.13	0.57	82	1.46	0.73	35.65	31.17	66.82	2.1	1.61	6.78	9.38	5.09	2.1	2.21	7.21	4.74	0.97	1.26	0.63	92	1.3	0.65	37.7	26.81	64.51	2.82	2.03	3.71	9.72	5.32	2.82	3.13
248	Controls_046	Controls	Female	68	153	78.8	33.7	49.1	0	0	30	0	0	0	0	0.83	1.21	0.6	83	1.45	0.73	35.66	29.57	65.23	2.18	1.69	6.68	16.12	5.74	2.18	2.34	2.54	4.57	1.03	1.28	0.64	96	1.25	0.62	38.26	25.04	63.3	3.09	1.86	3.79	10.44	4.58	3.09	2.99
249	Controls_047	Controls	Female	67	153	47.9	20.5	34.8	0	10	30	7200	560	990	8750	0.78	1.17	0.58	79	1.5	0.75	34.1	31.55	65.65	1.93	1	8.01	11.14	3.79	1.93	1.34	0.72	3.82	0.97	1.26	0.63	92	1.3	0.65	37.03	26.29	63.32	2.31	1.61	4.82	4.67	3.18	2.31	2.48
250	Controls_048	Controls	Female	66	156	72.3	29.7	41.8	3	3	29	3600	0	495	4095	0.89	0.99	0.49	107	1.11	0.56	38.1	24.3	62.39	5.14	2.93	6.2	7.75	5.86	5.14	5.28	1.3	3.94	1.11	1.37	0.68	96	1.23	0.62	37.59	25.6	63.19	6.05	3.67	6.39	13.72	7.88	6.05	5.96
251	Controls_049	Controls	Female	68	152	54	23.4	30	1	4	28	7200	0	1188	8388	0.81	1.01	0.5	95	1.25	0.63	36.5	26.61	63.11	1.56	1.09	3.24	3.56	2.3	1.56	1.74	1.07	2.64	1	1.12	0.56	107	1.12	0.56	37.42	24.91	62.33	1.18	0.67	2.2	6.05	1.84	1.18	1.19
252	Controls_050	Controls	Female	67	150	77.8	34.6	45	1	0	27	2400	0	1386	3786	0.89	0.99	0.49	107	1.11	0.56	36.7	26.17	62.87	2.65	1.44	3.77	8.97	3.74	2.65	2.58	1.06	3.27	1.17	1.18	0.59	118	1.01	0.51	38.75	22.18	60.93	1.49	0.76	2.41	6.71	1.79	1.49	1.5
253	Controls_051	Controls	Female	69	164	68.4	25.4	40	2	4	30	4800	0	346.5	5146.5	0.75	0.83	0.41	108	1.11	0.55	36.3	27.49	63.79	8.05	4.46	9.45	12.8	10.03	8.05	8.08	0.24	3.7	0.94	0.93	0.47	121	0.99	0.49	38.18	24.34	62.52	4.24	2.08	4.88	10.22	4.47	4.24	4.22
254	Controls_052	Controls	Female	66	150	60.7	27	41	6	3	25	3600	0	0	3600	0.61	0.73	0.37	99	1.2	0.6	33.51	30.73	64.24	2.21	1.4	7.25	6.25	3.14	2.21	2.33	6.48	4.71	0.78	0.88	0.44	106	1.13	0.56	36.32	26.1	62.42	3.1	1.78	7.78	13.59	5.23	3.1	3.16
255	Controls_053	Controls	Female	69	153	50.9	21.7	31.5	6	0	30	2880	600	1386	4866	0.56	0.66	0.33	101	1.18	0.59	34.09	32.69	66.78	3.25	1.78	7.12	12.58	4.92	3.25	3.02	2.62	4.57	0.69	0.81	0.4	102	1.16	0.58	35.33	29.13	64.46	3.03	1.73	4.73	5.46	3.53	3.03	2.98
256	Controls_054	Controls	Female	66	153	48.2	20.6	23.6	2	2	28	3600	0	693	4293	0.67	0.9	0.45	88	1.35	0.68	35.01	28.18	63.18	2.17	1.35	4.67	6.33	3.74	2.17	1.99	5.03	4.57	0.83	0.95	0.47	105	1.14	0.57	36.19	25.66	61.85	1.92	1.11	4.14	8.81	3.32	1.92	1.96
257	Controls_055	Controls	Female	67	165	77.1	28.3	39.1	3	6	29	1920	0	0	1920	0.61	0.74	0.37	98	1.21	0.6	37.16	28.84	66	4.89	3.19	9.73	9.61	7.13	4.89	5.27	8.9	6.87	0.75	0.84	0.42	107	1.11	0.56	37.08	27.55	64.63	3.06	1.73	6.39	9.55	4.35	3.06	3.1
258	Controls_056	Controls	Female	66	155	57.9	24.1	35.7	1	3	27	2880	0	693	3573	0.56	0.56	0.28	118	1.01	0.5	33.32	32.6	65.91	5.16	1.33	6.35	13.61	6.49	5.16	2.64	2.28	8.07	0.69	0.73	0.36	114	1.05	0.52	36.03	29.3	65.33	5.68	2.7	5.88	16.31	7.66	5.68	5.14
259	Controls_057	Controls	Female	67	150	54.4	24.2	32.2	5	3	29	1440	0	297	1737	0.56	0.92	0.46	72	1.66	0.83	34.71	31.63	66.34	4.4	3.73	11.16	16.54	7.7	4.4	4.49	3.06	4.78	0.69	0.89	0.44	93	1.28	0.64	35.05	31.58	66.62	5.47	3.48	10.27	10.92	7.8	5.47	5.45
260	Controls_058	Controls	Female	66	157	70.9	28.8	41.4	0	2	30	3000	0	396	3396	0.56	0.92	0.46	72	1.66	0.83	32.43	32.66	65.09	6.16	5.03	15.89	27.63	13.6	6.16	6.05	7.35	6.72	0.69	1.06	0.53	78	1.52	0.76	34.71	27.86	62.58	4.73	3.5	6.25	15.77	7.09	4.73	4.59
261	Controls_059	Controls	Female	67	152	70.3	30.4	43.5	0	2	30	5760	720	462	6942	0.67	0.78	0.39	102	1.17	0.59	32.54	32.13	64.66	5.91	3.01	9.1	7.92	6.85	5.91	5.14	8.26	6.6	0.83	0.86	0.43	117	1.03	0.51	35.41	27.59	63	3.57	1.75	5.75	9.72	4	3.57	3.41
262	Controls_060	Controls	Female	65	156	78.5	32.3	47.2	0	13	29	1920	0	594	2514	0.83	1.01	0.51	99	1.21	0.61	38.62	23.21	61.83	1.56	0.89	2.34	6.83	2.01	1.56	1.46	1.09	2.86	1.03	1.06	0.53	116	1.03	0.52	39.87	20.91	60.78	1.21	0.66	1.75	5.53	1.56	1.21	1.27
263	Controls_061	Controls	Female	65	158	61.3	24.6	38.7	3	4	30	1200	0	1155	2355	0.89	1.05	0.53	100	1.19	0.59	36.42	28.33	64.75	5.07	2.48	8.32	15.75	6.31	5.07	4.18	3.26	6.71	1.11	1.16	0.58	115	1.04	0.52	37.41	24.74	62.14	2.27	1.22	5.11	3.99	3.27	2.27	2.34
264	Controls_062	Controls	Female	66	153	65.6	28	41.4	2	0	30	1440	360	1188	2988	1	1.58	0.79	76	1.58	0.79	36.13	27.28	63.41	3.69	2.82	11.52	22.47	7.91	3.69	3.58	1.27	9.73	0.83	1.18	0.59	84	1.41	0.71	37.57	25.15	62.72	2.41	2.17	6.81	5.96	4.14	2.41	3.07
265	Controls_063	Controls	Female	68	160	82.9	32.4	44.4	0	4	27	960	0	198	1158	0.67	0.89	0.44	90	1.33	0.67	35.75	25.87	61.62	3.08	2.07	7.77	7.3	4.47	3.08	3.11	7.08	4.54	0.83	0.97	0.48	103	1.16	0.58	36.1	24.73	60.83	2.45	1.38	4.19	7.85	3	2.45	2.38
266	Controls_064	Controls	Female	67	168	47.7	16.9	19.3	1	17	30	400	0	693	1093	0.56	0.51	0.26	130	0.92	0.46	40.21	17.73	57.94	3.25	1.37	3.74	19.04	5.55	3.25	2.98	4.47	5.46	0.69	0.66	0.33	125	0.96	0.48	36.93	26.4	63.33	2.39	1.28	4.76	10.6	3.86	2.39	2.67
267	Controls_065	Controls	Female	69	158	65.5	26.2	33.3	0	5	30	0	960	1584	2544	0.56	0.69	0.35	96	1.25	0.63	33.11	30.99	64.1	4.33	2.27	10.06	15.99	6.71	4.33	3.64	8.11	12.74	0.69	0.9	0.45	93	1.29	0.65	30.08	36.61	66.69	3.87	2.42	11.54	15.07	7.5	3.87	3.74
268	Controls_066	Controls	Female	68	153	57	24.3	35.5	2	0	30	3600	1080	3465	8145	0.89	1.02	0.51	103	1.15	0.58	38.7	21.62	60.32	1.9	1.06	3.48	7.4	2.14	1.9	1.84	2.52	3.08	1.11	1.21	0.6	110	1.08	0.54	39.45	20.48	59.94	1.02	0.51	1.91	6.35	1.68	1.02	0.93
269	Controls_067	Controls	Female	66	159	51	20.2	29	0	0	30	1920	0	495	2415	1	1.23	0.62	96	1.23	0.62	38.37	21.63	60	1.2	1.44	3.78	6.58	2.48	1.2	2.34	4.16	5.33	1.39	1.29	0.65	131	0.93	0.47	40.54	18.79	59.33	1.46	0.74	2.05	2.66	1.4	1.46	1.59
270	Controls_068	Controls	Female	68	155	68.8	28.6	38	3	0	28	2400	1200	2772	6372	0.58	0.96	0.48	73	1.64	0.82	33.86	29.33	63.19	5.58	2.84	13.88	11.85	10.2	5.58	3.45	8.35	9.06	1.08	1.18	0.59	109	1.09	0.55	40.31	20.2	60.51	1.59	0.81	1.41	4.04	1.82	1.59	1.48
271	Controls_069	Controls	Female	66	165	74.8	27.5	34.3	0	0	27	1920	0	264	2184	0.83	1.02	0.51	98	1.22	0.61	37.59	24.67	62.26	2.5	1.58	5.89	5.96	4.46	2.5	2.6	0.41	3.76	1.06	1.16	0.58	108	1.1	0.55	39.3	21.43	60.73	2.98	1.61	4.5	6.86	4.45	2.98	2.91
272	Controls_070	Controls	Female	70	154	59.6	25.1	32.8	3	12	28	0	1800	1188	2988	0.78	0.85	0.42	110	1.09	0.55	34.34	30.83	65.16	2.14	0.96	5.5	6.53	3.96	2.14	1.76	1.45	4.42	0.97	1.09	0.55	106	1.12	0.56	36.44	28.3	64.74	1.89	1	3.19	5.77	2.39	1.89	1.79
273	Controls_071	Controls	Female	72	153	52	22.2	27.6	1	0	27	0	960	495	1455	0.56	0.73	0.37	90	1.32	0.66	34.99	29.47	64.46	3.52	2.39	11.77	10.54	6.07	3.52	3.62	1.56	4.01	0.69	0.84	0.42	99	1.21	0.61	36.95	27.07	64.03	2.19	1.37	4.74	9.81	3.63	2.19	2.26
274	Controls_072	Controls	Female	72	148	48.2	22	28.2	1	0	27	0	600	990	1590	0.39	0.32	0.16	146	0.82	0.41	40.91	19.43	60.35	12.72	2.14	6.66	29.87	10.7	12.72	5.23	3.12	26.12	0.47	0.39	0.19	144	0.83	0.41	39.81	21.41	61.22	10.26	2.38	8.34	34.78	11.16	10.26	5.76
275	Controls_073	Controls	Female	73	151	58.2	25.5	39.7	1	0	28	0	0	1188	1188	0.78	0.98	0.49	95	1.26	0.63	38.65	24.88	63.53	4.43	2.92	6.82	9.93	5.43	4.43	4.65	5.81	6.58	0.97	1.13	0.56	103	1.16	0.58	38.39	23.29	61.68	2.2	1.38	4.26	11.6	3.59	2.2	2.38
276	Controls_074	Controls	Female	70	168	63.3	22.4	27.6	7	14	29	0	720	990	1710	0.78	1.05	0.52	88	1.34	0.67	37.91	24.99	62.9	3.81	2.52	11.18	9.69	7.73	3.81	3.74	2.17	6.65	0.97	1.16	0.58	100	1.19	0.6	38.32	23.29	61.61	2.33	1.24	4.37	10.54	3.09	2.33	2.08
277	Controls_075	Controls	Female	72	158	52.5	21	29.5	2	1	25	0	1280	396	1676	0.5	0.63	0.31	94	1.26	0.63	37.45	27.57	65.02	8.89	5.21	14.81	28.92	13.01	8.89	8.27	6.82	8.68	0.64	0.79	0.4	96	1.24	0.62	36.39	26.57	62.96	6.1	3.68	9.53	20.16	8.79	6.1	5.95
278	Controls_076	Controls	Female	72	164	65.7	24.4	28.7	0	1	26	0	480	924	1404	0.44	0.8	0.4	66	1.8	0.9	29.56	35.55	65.11	6.58	6.98	12.91	33.35	20.9	6.58	7.79	16.55	11.23	0.56	0.81	0.41	81	1.46	0.73	33.73	27.95	61.68	6.9	5.37	15.61	32.41	14	6.9	7.33
279	Controls_077	Controls	Female	71	149	56.3	25.4	35.8	3	0	30	1440	0	495	1935	0.5	0.75	0.38	79	1.5	0.75	37.76	23.06	60.82	5.72	4.37	13.52	14.35	10.39	5.72	5.8	3.68	6.62	0.64	0.77	0.39	99	1.21	0.61	36.45	24.57	61.02	4.51	2.54	9.87	18.44	7.09	4.51	4.19
280	Controls_078	Controls	Female	70	152	55.9	24.2	35.1	4	10	28	0	600	990	1590	0.5	0.59	0.29	102	1.18	0.59	34.21	29.82	64.03	1.73	0.9	4.17	8.04	3.21	1.73	1.53	5	3.01	0.61	0.7	0.35	104	1.15	0.57	35.1	30.54	65.63	2.76	1.59	5.08	7.5	4.45	2.76	2.77
281	Controls_079	Controls	Female	70	155	54.7	22.8	32.7	0	5	27	0	480	924	1404	0.56	0.85	0.42	77	1.53	0.76	34.04	31.11	65.15	3.35	2.56	6.88	7.15	4.99	3.35	3.36	2.37	3.12	0.69	0.75	0.38	110	1.08	0.54	33.93	30.59	64.52	2.97	1.55	3.02	8.37	4.27	2.97	2.86
282	Controls_080	Controls	Female	71	157	44.7	18.1	22.8	4	2	30	0	1800	495	2295	0.67	1.02	0.51	77	1.54	0.77	35.81	28.04	63.85	4.88	3.63	7.67	10.73	7.93	4.88	4.73	0.93	3.64	0.83	0.91	0.45	109	1.09	0.54	37.16	25.78	62.94	3.43	1.93	6.04	10.05	4.19	3.43	3.54
283	Controls_081	Controls	Female	74	153	54.8	23.4	33	3	7	26	0	1200	3564	4764	0.67	0.73	0.36	110	1.09	0.54	40.82	16.86	57.68	2.33	1.75	6.31	16.02	3.14	2.33	3.2	3.62	7.86	0.83	0.98	0.49	101	1.18	0.59	34.01	28.02	62.03	5.09	1.7	6.41	18.08	6.95	5.09	2.9
284	Controls_082	Controls	Female	71	154	54.1	22.8	32.9	0	0	27	960	3600	2970	7530	0.44	0.4	0.2	132	0.91	0.45	38.75	23.06	61.81	9.1	1.88	6.24	26.34	9.21	9.1	4.15	1.46	19.35	0.56	0.51	0.26	130	0.92	0.46	37.07	29.27	66.34	5.68	2.31	7.57	15.83	6.61	5.68	5.03
285	Controls_083	Controls	Female	70	150	62	27.6	29	0	0	25	4800	2400	4950	12150	0.69	0.69	0.35	119	1	0.5	33.76	32.59	66.34	3.85	2.34	8.44	10.93	4.67	3.85	4.69	0.3	7.65	0.83	0.68	0.34	146	0.82	0.41	35.59	28.9	64.48	2.55	0.93	2.99	7.29	2.93	2.55	2.27
286	Controls_084	Controls	Female	72	156	58.5	24	32.3	2	5	29	0	1920	1188	3108	0.58	0.67	0.33	104	1.14	0.57	35.83	25.84	61.67	2.66	1.51	4.7	6.76	4.03	2.66	2.64	6.94	5.8	0.69	0.72	0.36	114	1.04	0.52	35.47	27.96	63.43	3.35	1.65	4.08	8.68	4.07	3.35	3.17
287	Controls_085	Controls	Female	71	165	70	25.7	36.1	0	9	26	0	2400	1980	4380	0.61	0.69	0.35	105	1.13	0.57	42.76	13.4	56.15	6.3	3.62	13.03	42.82	9.62	6.3	6.41	2.52	16.43	0.78	1.02	0.51	91	1.32	0.66	35.5	28.62	64.12	5.8	3.41	9.51	22.96	8.54	5.8	5.18
288	Controls_086	Controls	Female	71	159	67.9	26.9	35.8	2	5	30	0	1200	2772	3972	0.67	0.77	0.38	103	1.15	0.58	36	29.2	65.2	4.28	2.35	8.34	11.53	4.75	4.28	4.08	3.38	6.3	0.83	0.95	0.47	105	1.14	0.57	38.26	25.03	63.29	3.4	1.62	7.44	16.75	4.75	3.4	2.85
289	Controls_087	Controls	Female	72	144	52	25.1	26.1	0	5	27	0	2400	1980	4380	0.44	0.45	0.23	117	1.02	0.51	34.9	29.37	64.27	4.21	1.78	4.94	8.88	4.99	4.21	3.5	2.34	5.27	0.56	0.55	0.27	122	0.99	0.49	35.81	28.44	64.26	5.66	2.23	5.43	14.75	6.93	5.66	4.51
290	Controls_088	Controls	Female	71	153	65	27.8	36.4	0	3	25	0	2400	2970	5370	0.72	0.99	0.49	87	1.37	0.68	35.44	27.52	62.96	2.84	1.94	3.38	8.71	3.76	2.84	2.83	4.41	2.72	0.92	0.81	0.41	134	0.89	0.44	41.67	20.79	62.46	7.01	3.28	6.68	23.27	7.63	7.01	7.41
291	Controls_089	Controls	Female	70	156	63	25.9	34.3	0	3	26	1440	1200	1980	4620	0.64	0.67	0.34	113	1.05	0.53	36.01	27.05	63.07	3.01	1.78	3.81	8.85	3.7	3.01	3.39	2.52	4.53	0.81	0.91	0.46	105	1.13	0.57	35.25	29.26	64.51	2.25	1.23	3.5	6.05	2.7	2.24	2.17
292	Controls_090	Controls	Female	74	156	56	23	38.4	7	3	30	0	0	396	396	0.78	0.9	0.45	103	1.16	0.58	37.23	27.46	64.69	1.98	1.08	3.48	8.77	3.68	1.98	1.88	5.3	3.29	0.83	0.89	0.44	112	1.06	0.53	38.24	26.38	64.62	1.9	0.82	3.39	5.77	2.6	1.9	1.55
293	Controls_091	Controls	Female	74	145	57	27.1	31.6	7	6	25	0	1440	594	2034	0.72	0.81	0.4	107	1.12	0.56	36.23	29.4	65.63	1.71	1.24	4	7.44	2.17	1.71	2.22	5.27	4.18	0.92	0.99	0.49	110	1.08	0.54	37.77	25.88	63.65	1.9	1.01	3.59	4.9	1.97	1.9	1.87
294	Controls_092	Controls	Female	71	160	64	25	35.6	0	5	25	0	360	1188	1548	0.33	0.49	0.25	80	1.48	0.74	29.59	38.77	68.36	3.87	1.97	11.3	16.8	7.85	3.87	2.66	6.67	6.7	0.42	0.42	0.21	117	1.01	0.51	41.97	20.6	62.56	5.6	2.91	10.05	26.11	6.91	5.6	5.73
295	Controls_093	Controls	Female	74	148	49	22.4	27.1	7	3	25	0	1440	1188	2628	0.25	0.26	0.13	116	1.02	0.51	39.08	22.73	61.81	4.3	2.05	5.5	18.49	6.1	4.3	4.01	2.31	8.79	0.28	0.27	0.14	122	0.98	0.49	36.64	27.24	63.88	6.96	3.69	7.01	30.02	11.83	6.96	7.56
296	Controls_094	Controls	Female	70	152	54	23.4	28.2	1	3	30	0	720	4158	4878	0.67	0.72	0.36	110	1.08	0.54	36.91	27.5	64.41	2.54	1.19	5.18	10.46	3.14	2.54	2.2	3.63	4.41	0.83	0.88	0.44	113	1.06	0.53	37.63	25.25	62.88	1.99	1.07	3.08	5.62	2.56	1.99	2.02
297	Controls_095	Controls	Female	70	150	57	25.3	34.7	7	4	26	1440	1440	1980	4860	0.56	0.48	0.24	139	0.86	0.43	38.87	18.05	56.92	9.21	0.95	3.23	32.63	9.69	9.21	2.2	10.29	20.33	0.69	0.61	0.3	137	0.87	0.44	38.63	22.4	61.03	3.41	0.91	2.2	10.73	3.4	3.41	2.09
298	Controls_096	Controls	Female	72	150	53	23.6	34.2	7	3	27	1440	2400	990	4830	0.56	0.73	0.36	92	1.31	0.65	34.8	28.04	62.84	3.02	1.86	4.84	10.76	6.02	3.02	2.84	6.58	6.44	0.69	0.8	0.4	103	1.16	0.58	35.61	25.92	61.54	3.3	1.85	4.37	9.08	4.63	3.3	3.2
299	Controls_097	Controls	Female	71	154	65	27.4	27.4	7	3	26	0	1200	1980	3180	0.56	0.6	0.3	111	1.08	0.54	35.19	26.35	61.54	5.15	1.37	3.84	15.61	6.63	5.15	2.54	8.87	6.74	0.69	0.71	0.36	115	1.03	0.51	34.28	26.8	61.08	5	1.9	4.47	13.6	6.36	5	3.69
300	Controls_098	Controls	Female	74	154	54	22.8	33.4	0	4	28	0	1200	1980	3180	0.61	0.81	0.41	89	1.33	0.67	32.86	30.59	63.44	1.56	1.12	4.77	7.47	2.75	1.56	1.68	10.67	2.98	0.78	0.79	0.4	117	1.02	0.51	33.49	30.94	64.44	7.91	3.97	6.73	10.63	7.33	7.91	7.78
301	Controls_099	Controls	Female	73	130	57	33.7	45	0	3	25	0	2400	990	3390	0.67	0.73	0.37	108	1.1	0.55	34.62	30.97	65.59	3.81	1.96	3.88	8.95	4.97	3.81	3.58	0.7	3.21	0.83	0.86	0.43	115	1.04	0.52	34.99	28.81	63.79	2.19	1.23	3.09	4.99	3	2.19	2.37
302	Controls_100	Controls	Female	74	158	47.6	19.1	26.4	5	0	25	0	1680	693	2373	0.78	1.03	0.52	90	1.33	0.66	35.66	27.25	62.91	2.4	1.82	5.14	5.93	3.45	2.4	2.74	3.96	2.96	0.97	1.15	0.58	100	1.19	0.59	36.34	25.69	62.03	2.05	1.17	3.53	3.94	2.67	2.05	1.96
303	Controls_101	Controls	Female	71	162	58.7	22.4	22.9	0	0	30	0	1680	693	2373	0.78	1	0.5	93	1.29	0.64	35.62	28.32	63.94	3.67	2.32	5.66	11.67	6.01	3.67	3.59	1.25	3.28	0.97	1.15	0.57	101	1.18	0.59	37.25	25.62	62.87	1.93	1.16	3.54	8.03	2.79	1.93	1.98
304	Controls_102	Controls	Female	74	160	59.1	23.1	36.1	0	0	30	0	1200	924	2124	0.44	0.74	0.37	72	1.66	0.83	31.53	34.96	66.5	7.34	6.84	16.04	23.64	15.39	7.34	8.22	6.06	10.52	0.56	0.69	0.34	96	1.24	0.62	33.77	34.19	67.95	8.56	5.75	13.08	25.71	12.08	8.56	9.28
305	Controls_103	Controls	Female	70	155	49.9	20.8	29.4	0	0	30	2400	1200	1386	4986	0.67	1.08	0.54	73	1.63	0.81	33.36	35.47	68.82	2.13	1.93	7.48	10.76	4.42	2.13	2.37	6.76	5.02	0.83	1.16	0.58	85	1.4	0.7	36.09	29.09	65.18	1.3	0.94	3.72	4.96	2.6	1.3	1.34
306	Controls_104	Controls	Female	73	156	64.4	26.5	39.9	0	0	30	2400	1200	1386	4986	0.72	1.2	0.6	71	1.66	0.83	33.04	34.65	67.69	1.36	1.06	7.21	7.3	3.34	1.36	1.28	2.22	3.61	0.92	1.29	0.64	84	1.4	0.7	35.88	27.35	63.23	1.57	1.09	5.05	8.25	2.33	1.57	1.55
307	Controls_105	Controls	Female	72	156	57.5	23.6	34	0	0	30	2400	1200	990	4590	0.78	1.17	0.58	80	1.5	0.75	33.32	32.85	66.17	1.7	1.32	5.29	8.31	4.53	1.7	1.77	1.52	3.17	0.97	1.28	0.64	90	1.32	0.66	37.07	27.23	64.3	2.03	1.25	4.9	8.73	3.39	2.03	1.9
308	Controls_106	Controls	Female	72	157	55	22.3	22.2	0	0	30	2400	1200	1386	4986	0.72	1.17	0.58	73	1.62	0.81	32.83	35.46	68.29	1.52	1.26	6.05	9.86	3.77	1.52	1.56	3.45	3.96	0.89	1.24	0.62	85	1.4	0.7	35.8	28.39	64.19	1.38	1.29	4.04	6.18	2.36	1.38	1.84
309	Controls_107	Controls	Female	72	165	71.6	26.3	31.3	0	0	30	0	0	0	0	0.83	1.21	0.61	82	1.46	0.73	35.77	29.55	65.32	2.7	1.78	8.29	11.88	4.97	2.7	2.45	3.1	4.75	1.06	1.33	0.66	94	1.26	0.63	38.03	24.83	62.86	2.11	1.39	4.99	4.42	2.57	2.11	2.21
310	Controls_108	Controls	Female	73	157	55	22.3	22.1	0	0	30	0	0	0	0	0.78	1.17	0.58	80	1.5	0.75	34.8	31.34	66.15	1.58	1.22	4.97	10.22	3.91	1.58	1.63	2.76	3.48	0.97	1.26	0.63	92	1.3	0.65	36.87	26.89	63.76	1	0.73	3.09	5.48	1.67	1	1.12
311	Controls_109	Controls	Female	72	151	62.7	27.5	35.3	0	0	30	0	0	0	0	0.72	1.12	0.56	77	1.55	0.77	30.27	38.23	68.49	1.51	1.15	4.51	7.23	4.16	1.51	1.48	4.02	2.57	0.92	1.23	0.62	89	1.35	0.67	33.55	31.44	64.98	1.78	1.15	3.73	4.2	2.38	1.78	1.71
312	Controls_110	Controls	Female	72	154	62.3	26.3	29.3	0	0	30	0	960	346.5	1306.5	0.83	1.2	0.6	82	1.44	0.72	32.13	34.19	66.32	1.48	0.84	4.36	7.35	3.01	1.48	1.17	4.53	3.37	1.03	1.29	0.64	95	1.25	0.63	34.72	28.98	63.7	1.77	1.06	3.22	6.56	2.49	1.77	1.7
313	Controls_111	Controls	Female	71	154	56.2	23.7	33.2	7	0	24	0	720	1386	2106	0.67	1.08	0.54	73	1.63	0.81	32.43	36.49	68.92	2.05	1.8	8.69	12.15	5.58	2.05	2.21	4.26	4.2	0.83	1.23	0.62	81	1.48	0.74	36.37	28.48	64.85	2.85	2.41	6.89	8.28	4.97	2.85	3.27
314	Controls_112	Controls	Female	71	154	50.9	21.5	28.2	0	0	30	0	0	0	0	0.78	1.16	0.58	81	1.49	0.74	34.91	31.2	66.11	2.13	1.44	6.98	9.62	4.83	2.13	1.94	2.96	4.25	0.97	1.3	0.65	89	1.34	0.67	37.11	26.91	64.02	3.8	1.78	3.74	14.78	6.31	3.8	2.67
315	Controls_113	Controls	Female	71	158	59.1	23.7	30.9	0	0	30	1280	0	693	1973	0.89	1.25	0.62	85	1.4	0.7	37	27.76	64.76	2.48	1.72	4.27	8.21	3.45	2.48	2.45	4.86	3.93	1.11	1.36	0.68	98	1.22	0.61	38.28	24.9	63.17	1.83	1.18	3.1	7.57	2.61	1.83	1.94
316	Controls_114	Controls	Female	70	152	55.4	24	30.1	2	2	30	1440	1680	924	4044	0.89	1.2	0.6	88	1.35	0.68	36.7	28.24	64.94	1.67	0.89	3.37	6.13	2.58	1.67	1.32	4.57	4.25	1.11	1.31	0.66	101	1.18	0.59	38.31	24.83	63.14	0.99	0.58	1.92	5.74	1.9	0.99	0.99
317	Controls_115	Controls	Female	70	149	73.2	33	49.2	2	1	29	3600	1200	1386	6186	0.89	1.2	0.6	89	1.35	0.67	37	27.81	64.81	2.22	1.51	4.37	7.12	3.49	2.22	2.25	5.02	3.84	1.11	1.33	0.67	99	1.2	0.6	38.51	25.09	63.6	1.13	0.56	2.25	6.57	2.13	1.13	0.94
318	Controls_116	Controls	Female	73	150	56.7	25.2	38.1	3	9	26	2880	2880	792	6552	0.83	1.21	0.61	82	1.45	0.73	35.55	30.03	65.58	2.9	2.29	6.56	10.06	5.5	2.9	3.15	3.22	4.03	1.03	1.31	0.65	94	1.27	0.64	37.5	26.78	64.28	4.01	1.64	3.45	15.64	6.71	4.01	2.58
319	Controls_117	Controls	Female	73	150	66.9	29.7	41.6	1	5	30	2880	0	198	3078	0.94	1.26	0.63	86	1.33	0.66	37.11	27.87	64.98	4.38	1.86	3.62	18.88	8.49	4.38	2.81	5.7	3.87	1.17	1.38	0.7	99	1.18	0.6	38.47	25.06	63.52	4.19	4.6	3	14.21	6.62	4.19	7.72
320	Controls_118	Controls	Female	74	151	74.1	32.5	42.7	4	0	30	480	600	99	1179	0.72	1.17	0.59	74	1.62	0.81	33.15	34.16	67.31	2.74	2.32	12.23	12.65	7.02	2.74	2.86	1.3	6.07	0.89	1.23	0.61	86	1.38	0.69	36.42	28.62	65.04	3.2	1.66	4.23	12.13	6.2	3.2	2.42
321	Controls_119	Controls	Female	73	163	84.9	32	48	0	4	30	2880	0	297	3177	0.83	1.23	0.61	81	1.47	0.74	38.07	24.15	62.22	2.36	1.73	6.13	13.19	4.31	2.36	2.35	0.78	4.53	1.06	1.44	0.72	87	1.37	0.68	38.28	22.94	61.23	5.64	2.35	4.38	22.89	9.22	5.64	3.45
322	Controls_120	Controls	Female	74	149	45.3	20.4	25.5	7	7	26	0	0	231	231	0.67	1.14	0.57	70	1.7	0.85	34.76	35.09	69.85	2.02	1.75	12.95	16.59	4.87	2.02	2.06	14.21	6.83	0.83	1.2	0.61	82	1.44	0.73	35.04	30.11	65.15	2.46	5.07	8.61	11.45	5.23	2.46	6.97
323	Controls_121	Controls	Female	70	150	59	26.2	38.7	0	1	29	5760	0	198	5958	0.78	1.13	0.57	82	1.45	0.73	36.42	28.89	65.31	1.5	1.18	5.38	7.05	2.79	1.5	1.62	4.86	3.57	0.97	1.25	0.63	93	1.29	0.64	38.28	24.73	63.01	1.75	1.26	4.49	9.62	3.08	1.75	1.95
324	Controls_122	Controls	Female	72	159	65.5	25.9	31.7	0	3	28	7200	0	1782	8982	0.81	1.16	0.58	83	1.44	0.72	35.93	29.57	65.5	3.3	1.6	5.68	13.39	6.78	3.3	2.21	4.09	6.04	1	1.25	0.62	96	1.25	0.62	38.05	25.27	63.31	1.37	0.84	2.67	3.66	1.86	1.37	1.34
325	Controls_123	Controls	Female	72	153	58.6	25	50.9	0	4	26	4800	0	1188	5988	0.78	1.13	0.56	82	1.45	0.73	35.1	32.25	67.35	1.64	1.23	5.55	9.9	4.34	1.64	1.69	7.17	3.46	0.97	1.25	0.63	92	1.29	0.64	37.84	26.4	64.24	1.44	1.18	2.92	4.91	2.59	1.44	1.83
326	Controls_124	Controls	Female	71	152	58	25.1	42	0	4	30	1920	0	0	1920	0.72	1.16	0.58	74	1.61	0.81	35.86	27.52	63.38	2.98	2.41	15.9	23.63	6.98	2.98	2.99	2.43	5.01	0.89	1.3	0.65	82	1.46	0.73	37.39	24.56	61.95	1.59	1.17	4.11	11.38	2.73	1.59	1.6
327	Controls_125	Controls	Female	70	150	69.9	31.1	45.4	0	0	30	480	0	396	876	0.89	1.22	0.61	88	1.37	0.68	38.07	24.73	62.8	7.59	5.34	14.49	15.83	9.98	7.59	7.82	2.31	5.82	1.11	1.47	0.74	90	1.33	0.66	38.34	24.75	63.09	5.21	3.37	10.86	10.02	8.79	5.21	5.08
328	Controls_126	Controls	Female	71	153	61.6	26.3	35.4	1	2	27	3600	0	297	3897	0.67	0.83	0.41	96	1.24	0.62	32.74	32.42	65.16	2.86	1.69	7.55	8.59	4.32	2.86	2.72	6.2	4.1	0.83	1.01	0.5	99	1.21	0.6	35.28	27.81	63.09	2.93	1.69	7.17	5.28	4.08	2.93	2.79
329	Controls_127	Controls	Female	71	164	80.2	29.8	36.3	0	3	26	800	0	148.5	948.5	0.44	0.39	0.19	136	0.87	0.43	47.2	13.83	61.02	6.43	5.5	14.92	57.14	8.85	6.43	12.67	19.13	33.84	0.56	0.52	0.26	128	0.93	0.46	45.78	18.54	64.32	3.36	5.4	16.3	41.64	3.57	3.36	11.65
330	Controls_128	Controls	Female	77	160	57	22.3	21.5	0	0	30	2400	1200	594	4194	0.42	0.42	0.21	117	1.02	0.51	35.64	27.36	63	9.19	3.46	12.5	30.06	11.25	9.19	6.81	3.73	23.43	0.5	0.45	0.22	134	0.89	0.45	38.53	24.2	62.73	13.52	4.61	16.59	48	13.98	13.52	10.3
331	Controls_129	Controls	Female	77	148	48	21.9	32.1	4	5	26	0	1440	1980	3420	0.61	0.98	0.49	74	1.6	0.8	31.92	33.3	65.22	5.35	4.58	17.08	14.53	10.39	5.35	5.7	8.57	8.44	0.78	0.83	0.42	112	1.07	0.53	38.79	22.1	60.9	2.87	1.5	3.67	5.7	3.32	2.87	2.82
332	Controls_130	Controls	Female	75	153	56	23.9	28.1	7	3	25	0	2400	1980	4380	0.72	0.83	0.41	104	1.15	0.57	35.49	29.27	64.76	2.49	1.27	5.03	4.65	3.57	2.49	2.21	0.73	3.59	0.92	0.94	0.47	117	1.03	0.51	36.44	27.76	64.2	1.82	0.96	3.26	5.19	2.23	1.82	1.88
333	Controls_131	Controls	Female	76	158	55.3	22.2	28.4	6	7	30	0	0	495	495	0.56	0.77	0.38	87	1.38	0.69	35.3	29.47	64.77	7.56	5.08	11.42	16.17	12.11	7.56	7.37	0.19	7.4	0.69	0.77	0.39	107	1.11	0.56	35.49	28.92	64.41	2.48	1.38	3.69	8.03	3.1	2.48	2.48
334	Controls_132	Controls	Female	76	155	59	24.6	33.2	0	3	26	0	2400	1980	4380	0.44	0.64	0.32	82	1.44	0.72	30.01	40.87	70.88	7.46	5.42	12.62	15.01	11	7.47	7.52	2.99	8.03	0.56	0.74	0.37	89	1.34	0.67	33.38	33.36	66.74	5.56	3.86	12.25	16.19	7.51	5.56	5.77
335	Controls_133	Controls	Female	76	152	49	21.2	26.7	4	9	24	0	600	495	1095	0.61	0.84	0.42	87	1.37	0.68	32.78	29.65	62.43	5.48	3.59	10.43	10.89	6.45	5.48	5.25	13.84	6.01	0.75	0.9	0.45	99	1.21	0.6	33.63	28.76	62.39	3.25	2.02	4.74	7.56	4.71	3.25	3.35
336	Controls_134	Controls	Female	78	156	56	23	30.5	7	8	25	0	1440	594	2034	0.67	0.79	0.39	101	1.18	0.59	30.99	35.6	66.59	2.44	1.42	4.75	4.16	3.1	2.44	2.41	7.54	3.66	0.83	0.93	0.47	107	1.12	0.56	33.22	31.21	64.43	2.68	1.56	4.64	3.7	2.74	2.68	2.79
337	Controls_135	Controls	Female	76	155	60	25	35.6	7	9	24	0	1200	1188	2388	0.89	0.86	0.43	123	0.97	0.48	36.83	26.92	63.75	2.63	1.26	3.68	5.01	2.86	2.63	2.59	1.58	3.38	1.11	1.02	0.51	130	0.92	0.46	38.43	24.52	62.95	1.36	0.61	2.77	3.95	1.75	1.36	1.32
338	Controls_136	Controls	Female	79	153	57	24.3	31.7	0	7	26	1440	1200	594	3234	0.56	0.73	0.36	91	1.31	0.66	35.23	28.7	63.92	3.39	2.46	10.3	18.37	5.97	3.39	3.75	2.33	6.4	0.69	0.83	0.41	101	1.19	0.59	35.18	27.83	63	2.46	1.6	4.94	10.48	3.16	2.46	2.69
339	Controls_137	Controls	Female	75	155	53	22.1	28.7	0	4	26	1440	2400	1980	5820	0.56	0.89	0.44	74	1.6	0.8	35.82	27.33	63.15	4.43	2.97	10	23.1	8.66	4.42	3.73	2.83	3.71	0.69	0.98	0.49	85	1.41	0.71	36.18	25.87	62.05	3.54	2.42	7.13	16.02	6.15	3.54	3.43
340	Controls_138	Controls	Female	79	156	55.4	22.8	21.5	0	0	30	0	0	0	0	0.78	1	0.5	93	1.29	0.64	35.9	27.73	63.63	1.59	1.12	2.91	7.86	3.04	1.59	1.73	1.36	3.35	0.97	1.06	0.53	109	1.09	0.55	36.46	25.99	62.44	1.24	0.76	1.7	4.09	1.69	1.24	1.4
341	Controls_139	Controls	Female	75	155	60	25	28.9	0	0	30	0	0	0	0	0.56	1.1	0.55	61	1.98	0.99	36.34	28.43	64.78	2.34	2.58	11.78	33.49	11.46	2.34	2.61	3.27	4.22	0.69	1.11	0.55	75	1.6	0.8	36.56	26.27	62.83	3.45	2.93	11.3	11.87	7.43	3.45	3.67
342	Controls_140	Controls	Female	75	150	55	24.4	27.7	0	0	30	0	0	0	0	0.56	0.96	0.48	69	1.72	0.86	37.17	28.32	65.49	2.41	1.89	10.02	12.78	4.87	2.41	2.19	7.42	4.09	0.83	1.24	0.62	80	1.49	0.74	38.74	23.75	62.49	5.31	3.61	9.53	24.38	9.05	5.31	4.85
343	Controls_141	Controls	Female	78	155	57.6	24	38.4	0	0	30	0	0	0	0	0.75	1.07	0.54	83	1.43	0.72	36.72	23.88	60.6	4.16	2.76	6.63	10.82	4.73	4.16	3.85	6.95	4.27	0.94	1.09	0.54	103	1.15	0.58	37.32	24.86	62.17	2.38	1.34	4.23	6.76	2.45	2.38	2.33
344	Controls_142	Controls	Female	77	144	52.7	25.4	41.5	0	0	30	0	0	0	0	0.72	0.73	0.37	117	1.01	0.51	36.98	25.6	62.58	2.13	1.17	4.09	6.16	2.98	2.13	2.3	1.16	3.86	0.92	0.97	0.48	113	1.06	0.53	38.31	23.44	61.74	3.34	1.87	6.05	6.49	4.3	3.34	3.54
345	Controls_143	Controls	Female	76	152	56.5	24.5	31.4	0	0	30	0	0	0	0	0.5	0.6	0.3	99	1.21	0.6	35.39	28.01	63.4	3.82	1.96	5.72	12.88	6.05	3.82	3.24	3.35	6.18	0.61	0.66	0.33	110	1.09	0.54	35.25	27.47	62.72	4.05	1.43	4.56	12.28	5.35	4.05	2.62
346	Controls_144	Controls	Female	78	155	63.5	26.4	33.8	0	0	30	0	0	0	0	0.78	0.91	0.46	102	1.17	0.59	37.73	25.27	63	2.71	1.66	4.72	5.39	3.91	2.71	2.83	1.96	3.18	0.83	1	0.5	100	1.19	0.6	37.6	24.95	62.54	1.98	1.09	2.94	7.63	2.53	1.98	1.82
347	Controls_145	Controls	Female	79	154	69.1	29.1	38.9	0	0	30	0	0	0	0	0.78	1.05	0.53	88	1.36	0.68	37.74	24.95	62.7	2.4	1.78	5.29	11.61	3.62	2.4	2.63	1.19	2.54	0.83	1.04	0.52	96	1.24	0.62	36.28	27.04	63.32	3.78	2.22	7.63	12.35	4.35	3.78	3.57
348	Controls_146	Controls	Female	75	162	58	22.1	19.6	0	0	30	0	0	0	0	0.58	0.74	0.37	94	1.27	0.63	30.16	34.05	64.21	3.03	1.93	8.53	10.19	4.53	3.03	3.05	17.11	7.44	0.69	0.75	0.37	111	1.08	0.54	33.06	31	64.07	1.7	1.15	4.63	8.32	2.73	1.7	2.13
349	Controls_147	Controls	Female	75	155	57	23.7	34	0	0	30	0	0	0	0	0.56	0.66	0.33	83	1.18	0.59	34.7	28.72	63.42	8.62	4.44	13.17	27.41	14.54	8.62	7.52	5.3	14.08	0.69	0.79	0.39	106	1.13	0.56	34.68	30.5	65.18	6.95	3.21	9.18	17.46	10.54	6.95	5.69
350	Controls_148	Controls	Female	75	147	69.7	32.3	48.4	0	0	28	0	0	0	0	0.53	0.75	0.38	83	1.42	0.71	31.24	36.42	67.67	2.69	1.72	6.2	9.07	5.36	2.69	2.42	3.42	3.59	0.42	0.58	0.29	86	1.39	0.69	29.7	39.54	69.24	3.47	2.7	8.48	10.66	6.03	3.47	3.89
351	Controls_149	Controls	Female	78	147	48.9	22.6	28.9	0	0	30	0	0	0	0	0.67	0.75	0.37	106	1.12	0.56	33.42	29.08	62.5	3.41	1.84	4.84	7.25	4.37	3.41	3.29	11.8	6.89	0.83	0.87	0.43	115	1.04	0.52	34.39	29.27	63.66	1.98	1.03	3.27	5.16	2.75	1.98	1.98
352	Controls_150	Controls	Female	79	151	61.9	27.1	45	0	0	29	0	0	0	0	0.56	0.5	0.25	132	0.9	0.45	39.11	22.78	61.89	2.7	1.01	4.53	12.86	3.29	2.7	2.24	2.6	6.42	0.69	0.63	0.31	132	0.9	0.45	38.24	25.48	63.72	2.73	1.33	3.29	6.95	2.69	2.73	2.93
353	Controls_151	Controls	Female	77	148	54	24.7	33.8	7	0	26	1440	720	594	2754	0.61	0.74	0.37	99	1.21	0.6	32.18	31.84	64.02	5.05	3.08	6.83	11.59	6.69	5.05	5.1	11.17	7.1	0.78	0.73	0.36	127	0.93	0.47	34.22	28.51	62.73	6.27	2.36	4.95	13.96	6.2	6.27	5.05
354	Controls_152	Controls	Female	75	153	64	27.3	39.5	0	7	30	0	720	1386	2106	0.44	0.5	0.25	106	1.13	0.56	36.1	25.75	61.85	4.2	1.45	4.08	13.3	5.72	4.2	2.57	5.5	10.28	0.56	0.58	0.29	114	1.04	0.52	36.06	27.33	63.39	3.17	1.44	4.55	10.26	3.76	3.17	2.75
355	Controls_153	Controls	Female	76	160	60	23.4	36.4	0	0	28	4800	720	1188	6708	0.28	0.25	0.13	130	0.91	0.46	29.84	35.55	65.39	3.32	1.61	6.39	7.24	4.14	3.32	3.52	14.83	14	0.33	0.31	0.15	130	0.92	0.46	32.15	33.31	65.46	3.61	1.96	6.38	11.99	5.67	3.61	4.26
356	Controls_154	Controls	Female	76	152	66.5	28.8	39.1	5	24	27	2880	0	495	3375	0.31	0.34	0.17	107	1.11	0.56	29.05	42.29	71.33	3.83	2.16	5.95	8.64	5.51	3.83	3.9	1.32	7.59	0.42	0.39	0.2	126	0.94	0.47	31.34	37.76	69.1	7.36	3.69	10	10.12	7.6	7.36	7.8
357	Controls_155	Controls	Female	76	156	61.3	25.2	37.1	0	1	30	5760	0	297	6057	0.33	0.44	0.22	91	1.32	0.66	32.39	37.02	69.41	5.83	3.1	13.22	21.9	9.42	5.83	4.73	5.7	12.95	0.42	0.52	0.26	94	1.26	0.63	31.57	36.24	67.81	3.92	2.53	5.27	14.14	6.38	3.92	4.03
358	Controls_156	Controls	Female	75	155	51.7	21.5	25.1	3	0	27	0	1200	1980	3180	0.61	0.84	0.42	87	1.38	0.69	34.54	30.31	64.85	4.19	2.93	7.23	8.96	6.58	4.19	4.26	1.74	3.43	0.78	0.82	0.41	114	1.05	0.52	34.83	28.34	63.16	4.24	1.1	4.06	10.79	4.93	4.24	2.1
359	Controls_157	Controls	Female	87	157	53.3	21.6	30.2	0	5	28	1440	720	594	2754	0.44	0.49	0.25	108	1.11	0.55	34.11	30.08	64.19	2.79	1.61	4.78	9.05	4.1	2.79	2.91	4.86	4.51	0.56	0.61	0.31	108	1.1	0.55	35.13	30.1	65.24	3.34	1.83	5.67	8.39	4.38	3.34	3.32
360	Controls_158	Controls	Female	86	154	57.2	24.1	32.9	0	0	30	0	0	0	0	0.33	0.63	0.32	64	1.88	0.95	35.05	34.12	69.17	8.35	8.65	18.29	37.13	20.59	8.35	9.15	12.85	13.87	0.42	0.7	0.35	71	1.69	0.85	32.55	37.98	70.53	12.91	11.94	20.53	37.51	25.92	12.91	14.12
361	Controls_159	Controls	Female	81	157	56.5	22.9	24.2	0	0	22	0	800	0	800	0.67	1.05	0.53	76	1.58	0.79	34.06	31.92	65.98	2.2	1.79	9.81	13.73	4.71	2.2	2.27	0.1	3.47	0.83	1.17	0.59	85	1.4	0.7	36.67	27.39	64.06	1.8	1.22	4	11.12	3.84	1.8	1.73
362	Controls_160	Controls	Female	84	152	51.6	22.3	26.6	0	0	30	0	0	0	0	0.56	1.09	0.54	61	1.96	0.98	29.5	41.8	71.3	1.99	1.7	12.65	8.13	3.8	1.99	1.74	2.73	4.41	0.69	1.21	0.6	69	1.74	0.87	34.25	32.6	66.85	1.75	1.41	11.56	14.97	4.29	1.75	1.63
363	Controls_161	Controls	Female	81	155	59.5	24.8	35	0	0	30	0	0	0	0	0.89	1.25	0.63	84	1.41	0.7	36.44	26.85	63.29	1.62	0.81	4.36	7.21	2.46	1.62	1.15	0.73	2.44	1.11	1.36	0.68	97	1.22	0.61	38.73	22.63	61.36	1.32	0.75	3.74	7.91	1.61	1.32	1.22
364	Controls_162	Controls	Female	87	151	50.2	22	22	0	0	30	0	0	0	0	0.67	1.14	0.57	69	1.72	0.86	32.06	37.85	69.92	1.68	1.73	7.26	6.36	3.5	1.68	2.02	6.37	4.78	0.83	1.21	0.61	82	1.45	0.73	34.23	31.13	65.36	2.09	1.6	6.37	9.46	4.16	2.09	2.19
365	Controls_163	Controls	Female	84	150	52	23.1	36.2	3	0	28	0	0	0	0	0.67	0.96	0.48	83	1.44	0.72	33.96	32	65.96	1.81	1.28	5.59	7.87	3.51	1.81	1.77	0.2	3.11	0.83	1.19	0.59	83	1.42	0.71	34.13	31.39	65.52	2.46	1.64	6.84	10.91	3.93	2.46	2.31
366	Controls_164	Controls	Female	81	151	68	29.8	41.8	0	0	27	0	0	0	0	0.78	1.16	0.58	80	1.5	0.75	33.61	32.91	66.52	1.79	1.27	8.41	9.78	4.68	1.79	1.69	0.41	5.23	0.97	1.25	0.63	93	1.29	0.64	36.98	27.31	64.29	1.54	1.05	3.19	5.76	2.56	1.54	1.64
367	Controls_165	Controls	Female	80	149	48.3	21.8	26	7	0	26	0	0	0	0	0.72	1.1	0.55	78	1.53	0.76	33.29	34.81	68.09	2.32	1.4	6.75	11.29	5.39	2.32	1.83	4.24	4.29	0.89	1.19	0.6	89	1.34	0.67	36.55	28.22	64.77	1.35	1.07	3.66	5.78	2.46	1.35	1.59
368	Controls_166	Controls	Female	84	179	60	18.7	20	2	0	30	0	0	660	660	0.78	1.13	0.56	82	1.45	0.72	33.69	31.72	65.41	3.52	2.51	8.19	11.15	5.32	3.52	3.47	2.68	5	0.97	1.26	0.63	92	1.3	0.65	34.4	30.02	64.41	2.99	3.68	2.99	8.8	4.8	2.99	5.65
369	Controls_167	Controls	Female	84	168	70	24.8	27	0	0	26	0	0	594	594	0.83	1.19	0.59	84	1.43	0.71	33.08	32.61	65.69	1.77	1.45	4.56	7.13	3	1.77	2.04	3.64	4.33	1.03	1.29	0.65	93	1.25	0.63	34.99	29.06	64.05	2.97	3.66	3.29	10.24	5.22	2.97	5.81
370	Controls_168	Controls	Female	72	168	63.6	22.5	22.5	0	7	26	1440	0	297	1737	0.67	1	0.5	80	1.5	0.75	31.65	34.89	66.54	2.09	1.56	7.82	9.19	3.67	2.09	2.08	5.56	4.15	0.83	1.18	0.59	84	1.42	0.71	33.09	32.7	65.78	1.95	1.37	4.93	4.29	2.97	1.95	1.93
371	Controls_169	Controls	Female	66	158	66	26.4	36.7	2	0	30	0	720	990	1710	0.89	1.21	0.61	88	1.36	0.68	33.16	32.23	65.39	1.75	1.24	3.39	6.14	2.62	1.75	1.82	4.28	3.19	1.11	1.32	0.66	100	1.19	0.59	35.35	28.02	63.38	3.75	1.17	2.28	13.65	5.97	3.75	1.97
372	Controls_170	Controls	Female	65	171	69	23.6	30	6	24	25	0	1200	990	2190	0.83	1.21	0.61	82	1.46	0.73	32.52	33.77	66.3	2.39	1.63	6.7	11.14	4.48	2.39	2.25	3.56	3.18	1.03	1.28	0.64	95	1.25	0.63	34.48	29.4	63.87	1.76	1.14	3.07	4.89	2.45	1.76	1.82
373	Controls_171	Controls	Female	68	148	57	26	33.9	3	10	28	0	1000	1188	2188	0.78	1.16	0.58	80	1.49	0.74	30.86	36.18	67.04	2.19	1.54	4.3	9.61	4.74	2.19	2.07	6.6	3.56	0.97	1.28	0.64	91	1.31	0.66	33.85	30.58	64.44	1.82	1.85	2.99	5.04	2.88	1.82	2.81
374	Controls_172	Controls	Female	65	165	52.7	19.4	24.5	1	0	27	0	960	990	1950	0.72	1.14	0.57	75	1.58	0.79	35.87	29.12	64.99	2.32	1.61	5.28	10.76	5.22	2.32	2.04	2.44	4.31	0.89	1.21	0.61	87	1.37	0.68	38.34	25.25	63.59	0.96	0.8	3.11	7.45	2.14	0.96	1.18
375	Controls_173	Controls	Female	65	157	58	23.5	30	6	0	28	0	600	1386	1986	0.67	1.06	0.53	75	1.6	0.8	32.83	35.81	68.63	2.06	1.9	7.54	10.18	5.18	2.06	2.39	4.56	3.38	0.83	1.22	0.61	82	1.46	0.73	35.84	29.4	65.23	2.59	1.62	6.3	15.5	5.66	2.59	2.23
376	Controls_174	Controls	Female	69	148	53.2	24.3	34.6	0	15	29	4320	0	0	4320	0.58	1.04	0.52	67	1.79	0.89	29.87	41.72	71.6	2.57	2.13	12.09	11.77	4.68	2.57	2.38	5.04	4.45	0.72	1.12	0.56	77	1.56	0.78	33.35	34.48	67.83	3.23	3.41	10.14	16.37	7.06	3.23	4.39
377	Controls_175	Controls	Female	65	152	63.7	27.6	37.5	6	5	27	2400	0	594	2994	0.78	1.2	0.6	77	1.54	0.77	35.66	29.88	65.53	1.72	1.38	4.79	7.75	3.88	1.72	1.78	3.4	3.77	0.97	1.17	0.59	98	1.21	0.6	37.53	26.25	63.78	10.65	6.01	10.98	22.32	14.42	10.65	9.99
378	Controls_176	Controls	Female	71	155	56.6	23.6	31	7	4	24	0	1200	990	2190	0.78	1.24	0.62	75	1.6	0.8	37.25	24.84	62.09	1.85	1.45	7.86	15.84	4.39	1.85	1.81	1.76	3.15	0.97	1.43	0.71	81	1.47	0.73	39.24	22.02	61.25	2.47	1.88	5.15	5.76	3.95	2.47	2.56
379	Controls_177	Controls	Female	71	156	54.4	22.4	30	2	4	30	0	1200	2772	3972	0.67	0.53	0.27	150	0.8	0.4	36.45	26.27	62.72	3.09	1.35	4.89	6.8	3.15	3.09	3.4	2.22	5.5	0.83	0.72	0.36	138	0.87	0.43	37.07	25.97	63.03	2.1	0.97	3.77	8.02	2.51	2.1	2.23
380	Controls_178	Controls	Female	70	159	57	22.5	28.2	0	0	30	5760	4320	1188	11268	0.56	0.66	0.33	101	1.19	0.59	34.3	26.18	60.48	5.29	2.23	6.07	19.61	8.75	5.29	3.76	14.18	9.27	0.69	0.66	0.33	125	0.96	0.48	39.57	16.31	55.88	8.59	2.06	5.53	44.61	12.61	8.59	4.29
381	Controls_179	Controls	Female	74	150	63.7	28.3	41.3	1	0	30	1440	1440	1386	4266	0.78	0.94	0.47	98	1.21	0.61	36.59	25.77	62.36	3.74	2.37	6.8	8.14	5.8	3.74	3.9	2.82	5.72	0.97	1.02	0.51	113	1.05	0.53	38.12	23.61	61.73	2.05	1.05	2.99	6.07	2.61	2.05	2
382	Controls_180	Controls	Female	73	150	54.7	24.3	36.9	2	1	29	4320	0	594	4914	0.44	0.85	0.41	64	1.91	0.92	33.94	27.66	61.6	16.35	14.82	33.2	52.01	34.78	16.36	16.2	12.34	24.19	0.56	0.81	0.41	81	1.47	0.74	36.01	24.74	60.75	13.93	10.09	18.62	43.78	25.68	13.93	13.73
383	Controls_181	Controls	Female	73	157	51.8	21	32.5	1	3	30	4800	0	396	5196	0.67	1.01	0.5	79	1.51	0.76	36.96	27.36	64.32	2.1	1.66	5.37	5.59	3.32	2.1	2.2	3.55	4.17	0.83	1.07	0.53	93	1.28	0.64	38.28	25.21	63.49	1.97	1.3	5.39	5.35	3.43	1.97	2.04
384	Controls_182	Controls	Female	74	163	66	24.8	48	1	1	30	4320	0	0	4320	0.44	0.82	0.41	64	1.86	0.93	33.32	30.66	63.98	5.07	4.13	10.19	20.92	11.45	5.07	4.46	7.78	4.67	0.56	0.89	0.45	74	1.61	0.8	30.27	33.6	63.87	3.76	3.24	5.12	13.97	7.1	3.76	4.04
385	Controls_183	Controls	Female	75	156	60	24.7	29.2	7	8	26	0	0	990	990	0.36	0.33	0.17	130	0.92	0.46	37.93	25.43	63.36	3.61	1.43	6.39	10.77	3.9	3.61	3.11	3.47	7.38	0.42	0.37	0.19	132	0.9	0.45	39.22	23.47	62.68	4.67	1.84	7.21	14.89	4.36	4.67	4.09
386	Controls_184	Controls	Female	76	158	59	23.6	29	2	9	27	0	600	1188	1788	0.67	1.11	0.55	72	1.66	0.83	31.1	40.16	71.26	3.01	2.39	12.79	12.07	6.41	3.01	2.88	7.87	5.46	0.83	1.18	0.59	84	1.42	0.71	35.12	31.1	66.22	1.93	1.53	6.86	8.38	4.49	1.93	2.16
387	Controls_185	Controls	Female	75	155	53	22.1	27.2	0	4	27	0	2400	1980	4380	0.72	1.12	0.56	77	1.54	0.77	30.6	37.14	67.74	2.3	1.7	5.29	8.33	5.46	2.3	2.21	5.29	4.22	0.92	1.25	0.62	87	1.36	0.68	33.33	31.55	64.88	2.06	1.36	4.37	5.5	2.99	2.06	1.99
388	Controls_186	Controls	Female	77	149	45.7	20.6	35.1	1	20	27	2400	0	5544	7944	0.64	1.08	0.54	71	1.69	0.84	29.07	41.12	70.19	2.08	1.71	6.61	8.76	5.38	2.08	2.03	2.78	5.19	0.81	1.19	0.59	81	1.47	0.74	32.29	33.09	65.38	1.96	1.29	4.75	5.99	2.92	1.96	1.75
389	Controls_187	Controls	Female	83	158	62.3	25	33.9	7	10	26	2400	720	594	3714	0.67	1.07	0.54	74	1.61	0.81	32.65	36.06	68.71	2.25	2.05	6.43	7.01	3.97	2.25	2.54	4.27	5.77	0.83	1.16	0.58	84	1.4	0.7	36.05	29.11	65.15	1.97	2.14	4.1	5.61	3.09	1.97	3.06
390	Controls_188	Controls	Female	74	151	59.4	26.1	39	1	0	30	640	0	1188	1828	0.58	1.03	0.52	68	1.77	0.89	31.48	40.73	72.21	2.84	2.05	7.02	11.16	6.05	2.84	2.32	12.47	5.76	0.72	1.14	0.57	76	1.58	0.79	34.36	34.1	68.46	2.28	1.6	9.69	12.13	5.88	2.28	2.04
391	Controls_189	Controls	Female	73	158	59.9	24	34.8	4	25	30	2880	0	297	3177	0.67	1.1	0.55	73	1.65	0.82	34.59	29.15	63.73	1.55	1.38	10.46	14.59	3.88	1.55	1.68	4.74	3.27	0.83	1.25	0.62	80	1.5	0.75	37.18	24.97	62.15	1.61	1.26	7.1	12.67	3.04	1.61	1.69
392	Controls_190	Controls	Female	76	160	68	26.6	35	0	5	30	2400	2880	1155	6435	0.61	0.95	0.48	76	1.56	0.78	38.24	27.14	65.38	3.77	3.18	11.87	21.42	7.09	3.77	4.08	9.95	6.28	0.75	1.07	0.54	83	1.43	0.72	39.21	25.08	64.3	2.31	1.44	6.28	6.29	4.58	2.31	2.01
[truncated: 20 more columns]
